# Supplementary material
Source: Elsevier journal article supplement (https://comptes-rendus.academie-sciences.fr/biologies/article/10.1016/j.crvi.2011.09.004/file/attach/mmc1.pdf)
Supplement: mmc1 [file mmc1.pdf]

# Supplementary Information

## TableS1. Protein sequences of all members of the HMA1-4 gene family

Sequences with their names highlighted in green were taken into account in the phylogenetic analysis while sequences with their names highlighted in yellow were not. Indeed, the latter sequences either were too short, or corresponded to pseudogenes.

### >AhHMA1

AWRVANAVGITEVYCNLKPEDKLNHVKNISREAGGGLIMVGEIN DAPALAAATIGIVLAQRASATAIAVADILL  
LRDTITGVPFCVAKSRQTTSLVKQNALALTSIFVAALPSVLGFVPLWLTVLLHEGGTLLVCLNSVRGLNDPSWS  
WKQDIVHLINKLSSQEPSISSNSLSSVEPAH

### >AhHMA3

MAEGEEAKKKNLQTSYFDVVGICCTSEVSVIVGDVLRPLDGVKEFSVIVPSRTVIVVHDTFLISPLQIVKALNQAR  
LEASVRPYGETSLKSQWSPFFAILSGVFLALSFFKYFYSLLEWLAVVAVVAGIFPILAKAVASVTRFRDLINALT  
FIAVIATLCMQNFTEAATIVFLFSVADWLESSAAHKASTVMSSLSLAPRKAVIAETGHEVDVDEVRIINTIVSVK  
AGESIPIDGVVVDGSCDVDEKTLTGESFPVSKQRDSTVLAATINLNGYIKVKTALARDCVVAKMTKLVEEAQKS  
QTKTQRFIDKCSRYTTPAVVLAACFAVIPVLLKQLDLSHWFHLALVVLVSGCPCGLILSTPIATFCALTKAAMS  
GFLIKTGDCLLETAKIKIVAFDKTGTITKAEFMVSDFRSLSHNINLHNLVWVSSIESKSSHPMAAALIDYARSV  
SVEPKPDLVENFQNFPGEGVYGRIDGQDIYIGNKRIAQRAGCLTVPDMEANMKRGTIGYIYIGAKLSGSFNLID  
SCRYGVAQALKELKSLGIKTAMLTGDNDAALSTQEQLENALDIVHSELLPQDKARIIDEFKIQGPTMMVGDGLN  
DAPALAKADIGLSMIGISGSALATETGDIILMSNDIRKIPKGMRLAKRSHKKVIENVVLSVSIKGAIMVLAFLVGY  
LVWAAVLADAGTCLLVILNSMMLLRDEREAVSTCYRASSSPVKLEEDEAEDLEVGLLQKSEETNKKSCCSGSCSG  
PKDNQOK

### >AhHMA4-1

MASQNKKEEKKVKKLQKSYFDVLGICCTSEVPIIENILKSLDGVKEYSVIVPSRTVIVVHDSLLISPFQIAKAL  
NQARLEANVRVNGETNFKNKWSPFFAVVSGLLLLLSFLKFVYSPLRWLAVAAVAAGIYPILAKAFASIRRLRDI  
NILVITVIATLAMQDFMEAAAVVFLFTIADWLETRASYRATAVMQSLMSLAPQKAI I AETGEEVEVDEVKYSTV  
VAVKAGETIPIDGIVVDGNCEVDEKTLTGAEFPVPKQKDSVWAGTINLNGYISVKTTSLAGDCVAVKMAKLVEE  
AQSSKTKSQRLLDKCSQYYTPAIIVVSACVAIVPVMKVHNLKHWFLALVVLVSGCPCGLILSTPVATFCALTK  
AATSGLLIKSADYLDTLISKIKIAAFDKTGTITRGEFIVIDFKLSRDISLRSLLYWVSSVESKSSHPMAATIVDY  
AKSVSVEPRPEEVEDYQNFPGEGIYKIDGNDIYIGNKRIASRAGCSTVPEIEVDTKGGKTVGYVYVGERLAGVF  
NLSDACRSQVQAMKELKSLGIKTAMLTGDSQAAAMHAQEQLGNALDVVHGELLPEDKSKI IQEFKKEGPTAMVG  
DGVNDAPALATADIGISMGISGSALATQTGHIILMSNDIRRIPOAVKLARRARRKVIENVCLSIILKAGILALAF  
AGHPLIWAAVLVDVGTCLLVILNSMMLLRREKKKIGNKKCYRASTMLNKRKLEGDDDDAVDLEAGLLTKSGNGQC  
KSSCCGDKKQEKVMMKPSKTSDDHSHPGCCGDKKQGNVPLVRDGGCSEETRAKAVGDMVSLSSCKKSSHVKH  
DLKMKGGSGCCANKSEKVEEVVAKSCCEKPKQOMESAGDCKSSHCEEKHAEEIVLPVQMIGQALTGLEIELQTK  
ETCKTRCCDNKEKAKKKGLLLSSEDTSYLEKGVLIKDEGNCKSACQKTGTVKESCHEKAPLDIETKLVSCGNTEG  
EVGEQTDLEIKIEGDCKSGCCSDEKQTEITLASEEETDSTDCSSGCCMDKEEVTQICGLETEGGGDCKSHCCGT  
GLTQEGSSKLGNVESAQSGGCGTVKVVSSQSCSTSDLVLSDLQVKKDEHCKSSHGAVKVEETCCKVKIPEACASE  
CKEKEKRHSKSCCRSYAKEFCSHRHHHHHHHHVSA

### >AhHMA4-2

MASQNKKEEKKVKKLQKSYFDVLGICCTSEVPIIENILKSLDGVKEYSVIVPSRTVIVVHDSLLISPFQIAKAL  
NQARLEANVRVNGETNFKNKWSPFFAVVSGILLLLSFLKFVYSPLRWVAVAAVAAGIYPILAKAFASIRRLRLDI  
NILVITVIATLAMQDFMEAAAVVFLFTIADWLETRASYRATAVMQSLMSLAPQKAI I AETGEEVEVDEVKYSTV  
VAVKAGETIPIDGIVVDGNCEVDEKTLTGAEFPVPKQKDSVWAGTINLNGYISVKTTSLAGDCVAVKMAKLVEE  
AQSSKTKSQRLLDKCSQYYTPAIIVVSACVAIVPVMKVHNLKHWFLALVVLVSGCPCGLILSTPVATFCALTK  
AATSGLLIKSADYLDTLISKIKIAAFDKTGTITRGEFIVIDFKLSRDISLRSLLYWVSSVESKSSHPMAATIVDY  
AKSVSVEPRPEEVEDYQNFPGEGIYKIDGNDIYIGNKRIASRAGCSTVPEIEIDTKGGKTVGYVYVGERLAGVF  
NLSDACRSQVQAMKELKSLGIKTAMLTGDSQAAAMHAQEQLGNVLDVVHGELLPEDKSKI IQEFKKEGPTAMVG  
DGVNDAPALATADIGISMGISGSALATQTGHIILMSNDIRRIPOAVKLARRARRKVIENVLSIILKAGILALAF  
AGHPLIWAAVLVDVGTCLLVIFNSMMLLRREKKKIGNKKCYRASTMLNKRKLEGDDDDAVDLEAGLLTKSGNGQC  
KSSCCGDKKQEKVMMKPSKTSDDHSHPGCCGDKKQGNVPLVRDGGCSEETRAKAVGDMVSLSSCKKSSHVKH  
DLKMKGGSGCCANKSEKVEEVVAKSCCEKPKQOMESAGDCKSSHCEEKHAEEIVLPVQMIGQALTGLEIELQTK  
ETCKTRCCDNKEKAKKKGLLLSSEDTSYLEKGVLIKDEGNCKSACQKTGTVKQSCHEKAPLDIETKLVSCGNTEG  
EVGEQTDLEIKIEGDCKSGCCSDEKQTEITLASEEETDSTDCSSGCCMDKEEVTQICGLETEGGGDCKSHCCGT  
GLTQEGSSKLGNVESAQFGGCGTVKVVSSQSCSTSDLVLSDLQVKKDEHCESSHGAVKVEETCCKVKIPEACAPE  
CKEKEKRHSKSCCRSYAKEFCSHRHHHHHHHHVSA

### >AhHMA4-3

MASQNKKEEKKVKKLQKSYFDVLGICCTSEVPIIENILKSLDGVKEYSVIVPSRTVIVVHDSLLISPFQIAKAL  
NQARLEANVRVNGETNFKNKWSPFFAVVSGILLLLSFLKFVYPPRLRWLAVVAVAAVAAGIYPILAKAFASIRRLRLDI  
NILVITVIATLAMQDFMEAAAVVFLFTIADWLETRASYRATAVMQSLMSLAPQKAI I AETGEEVEVDEVKYSTV

61 VAVKAGETIPIDGIVVDGNCEVDEKTLTGEAFVVPKQKDSSVWAGTINLNGYISVKTTSLAGDCVVAKMAKLVVEE  
62 AQSSKTKSQRLLDKCSQYYTPAIIVVSACVAIVPVMKVHNLKHWFLALVVLVSGPCGLILSTPVAATFCALTK  
63 AATSGLLIKSADYLDLTLKIKIAAFDKTGTITRGEFIVIDFKLSRDITLRLSLLYWVSSVESKSSHPMAATIVDY  
64 AKSVSVEPRPEEVEDYQNFPGEGIYGKIDGNDIYIGNKRIASRAGCSTVPETEIDTKGGKTVGYVYVGERLAGVF  
65 NLSDACRSGVSVQAMKELKSLGIKTAMLTGDSQAAAMHAQEQLGNALDVVHGELLPEKSKIIQEFKKEGPTAMVG  
66 DGVNDAPALATADIGISMGISGSALATQTGHIILMSNDIRRIPOAVKLARRARRKVIENVCLSIILKAGILALAF  
67 AGHPLIWAAVLVDVGTCLLVILNSMLLLREKKKIGNKKCYRASTSMNNGRKLKLEGDDDDAVDLEAGLLTKSGNGQC  
68 KSSCCGDKKNQEKVMMKPSKTSDDHSHPGCCGDKKQGNVPLVRDGGCSEETRKAVGDMVSLSSCKKSSHVKH  
69 DLKMKGGSGCCANKSEKVEEVVAKSCCEKPKQOMESAGDCKSSHCEEKHAEEIVLPVQMIGQALTGLEIELQTK  
70 ETCKTRCCDNKEKAKKGLLLSSEDTSYLEKGVLIKDEGNCKSACQKTGTQVKSCHAKAPLDIETKLVSCGNTGEG  
71 EVGEQTDLEIKIEGDKSGCCSDEKQTEITLASEEEADSTDCSSGCCMDKEEVTQICGLETEGGGDCCKSHCCGT  
72 GLTQEGSSKLGNETAQSOGCGTVKVSQSCCTSSTDLVLSLQVTKDEHCESSHGAVKQVETCKVKIPEACAPE  
73 CEKEKRHSKSCCRSYAKEFCSHRHHHHHHHHHHVSA  
74 >AHMA1-1  
75 MEPAALTRSSSLTRFPYRRGLATLRLARVNSFSVLTTPKTLRRKPLPLSISSSLSLPPRSIRIRAVEDHHHDDHHH  
76 DDEQDHDHHHHHHHHHQHGCCSVELKAESKPQKVLFGFAKTIGWVRLANLREHLHLCCSAAAMFLAAAACPYLA  
77 PKPYIKSLQNAFMIVGFPLVGVASLDMADIAGGKVNIVHLMALAAAFASVFMGNALEGGLLAMFNLAHIAEEF  
78 FTSRSMVDVKELKESNPDSALLIEVLNGVNPNISDLSYKSVPVHSVEVGSYILVGTGEIVPVDCEVYQGSATITI  
79 EHLTGEVPLEAKAGDRVPGGARNLDGRMIVKATKAWNDSTLNKIVQLTEEAHSNPKLQRLWDEFGENYSKVVV  
80 VLSLAIAFLGPFLFKWPFLLSTAACRGSVYRALGLMVAASPCALAVAPLAYATAISSCARKGILLKGAQVLDALAS  
81 CHTVAFDKTGTTLTGGTLTCKAIEPIYGHQGGNNSVTTCCIPNCEKEALAVAAAMEKGTTHPIGRAVVDHSGVD  
82 LPSIFVESFEYFPGRGLTATVNGAKSVAEESRLRKASLGSIEFITSFLKSEDESKQIKDAVNASLYGNDVFVHAAL  
83 SVDQKVTLIHLEDQPRPGVSGVIAELKSWARLRVMMLTGDHDSAWRVANAVGITEVYCNLKPEDKLNHVKNIAR  
84 EAGGGLIMVGEINDAPALAAATVGIVLAQRASATAIADVADILLRDNITGVFPFCVAKSRQTTSLVKQNIALALT  
85 SIFLAALPSVLGFVPLWLTVLLHEGGTLLVCLNSVRGLNDPSWSWKQDIVHLINKLSSQEPSTISSNSLSSVEPA  
86 H  
87 >AHMA1-2  
88 MESAALLHSSLTRFSCRQNSTLRLSRLNSTTLPRDVLIRTTNSNTLPRRSRLRFAKAAACENHHHHYHHEHDDHHHQ  
89 NHHQHCCSVELTVSNHLQKLLKFAKAIWIRLANFLRENHLCCSSVVLFLAAAACPHLMIPKPYITPIQNSFM  
90 IVAFPLVGISASLDMADIAGGKVNIVHLMALAAAFASVFMGNALEGGLLTMFNLAHIAEEFFTSRSMVDVKELN  
91 ESNPDSALDIVDNDENVNFFDLTYKSVHVMKAAVEVGSYILVGTGEIVPVDCEVYQGNATITIEHLTGEVPLEAK  
92 AGDRVPGGARTLNGRIIVKATKAWNESTLNKILQVTEEAHSNPKLERWLYEFGEIYKVVVVLVSAI AFLGPFL  
93 FKLPLVLTACRGSVYRALGFLVAASPCALAVAPLAYATAISSCARKGILLKGGQVLDALASCHTIGFDKGTTLT  
94 TGGLTCKAIEPIYGHQEGNNSVNPCCMPNCENEALAVAAAMEKGTTHPIGRAMVDHSGVDLPSVSVESFEYF  
95 PGRGLTATVNCIESVTEGRKLRKASLGSVEFITSLFESQDESRIKNAVNSSLYGNDVFHAVLSLDQKVTLIHLE  
96 DQPREVSKVLTELKSWGKMRIMMLTGDHESAWRVANAVGIDEVYCNLKPEDKLDHVKNISEGSGGGGLIMVGE  
97 GINDGPALAAATVGIVLAQRASASAIADVADVLLQDNITGVFPFCIAKSRQTTSLVKQNVAIALTSIFLAALPSVL  
98 GFLPLWLTVLLHEGGTLLVCLNSIRSLNDPSWSWKQDIVHELHLSKTHQHKTYRDGN  
99 >AHMA2  
100 MASKKMTKSYFDVLGICCTSEVPLIENILKSMGDGVEKSVIIVPSRTVIIVVHDTLILSQFQIVKALNQARLEANVR  
101 VTGETNFRNKWSPFAMVSGLLLLLFFKYLYSPFRWLAVAAVAGIYPIAKAVASLARFRIDINILVIITVGA  
102 TIGMRDYTEAGVVVFLFTIAEWLQSRASYKASAVMQSLMSLAPQKAMIAETGEEVQVDELKINTVIAVKAGETIP  
103 IDGVVVDGNEVDEKTLTGEAFVVPKLRDSTVWAGTINLNGYITVKTALAEDEVVAKMAKLVVEEAQNSKTETQR  
104 FIDKCSQYYTPAIIILISVCFAAIPFALKVHNLKHWIHLALVVLVSGPCGLILSTPVAATFCALTKAATSGLLIK  
105 ADYLETLAKIKVAFDKTGTITRGEFIVMDFQSLSEDISLHSLLYWVSSAESKSSHPMAAALVDYAKSVSVEPKP  
106 EAVEDYQNFPGEGIYGKIDGKEVYIGNKRIASRSGCSSVPDQVVDTKGGKTIYVYVVGKTLGSGVFNLSDACRSGV  
107 AQAMKELKALGIKTAMLTGDNQAAAMHAQEQLGNAMDIVRAELLPEGKSEIIEKFMREEGSTAMVGDGLNDAPAL  
108 ATADIGISMGVSGSAIATETGNIILMSNDIRRIPOAIKLARRAKRVVENVVTSITMKGAILALAFAGHPLIWA  
109 VLADVGTCLLVILNSMLLLSDNHKTGNKCYRESSSSIVEKLEGDAAGDMEAGLLPKISDKHCKSGCCGKTQVK  
110 VMQPAKSSSDHSHSGCCEKQKQDNVTVVKKSSCAEPVDLVQGHDSGCCGNKSQPNQHEVQQSCHNKPSGLDIGT  
111 GSQHEGSSTVVNLEGDEQEEVKVSVKCCSSPADLAVTSLKVKSDGHSKSSCCCESSKRDKEGASSQVTKKACKS  
112 NCSREKSHHGSSCCSSYAKECCSHHHHHHTRANGIGSLKEIVIE  
113 >AHMA3  
114 MAEGEEAKKNLQTSYFDVVGICCSSEVSIVGDVLRPLDGVEKFSVIVPSRTVIIVVHDTFLISPLQIVKALNQAR  
115 LEASVTRPYGDTSLKSQWSPFAIVSGVFLAVSFFKYFYNLLEWLAIAAVVAGIFPIAKAVASVTRFRDINGLT  
116 LIAVIATLCMQDFTEAATIVFLFSVADWLESSAAHKASTVMSSLSLAPRKAVIDATGLEVDVDEVRIINTIVSVK  
117 AGESIPIDGVVVDGSDVDEKTLTGESFPVSKQRESTVLAATINLNGYIKVKTALARDCVVAKMTKLVEEAQKS  
118 QTKTQRFIDKCSRYYPVAVVLAACFAVIPALLKQVNLSHWFLALVVLVSGPCGLILSTPVAATFCALTKAATS  
119 GFLIKTGDCLTLAKIKIVAFDKTGTITKAEFMVSDFRSLSHNINLHNLWVSSIESKSSHPMAAALIDYARLI  
120 FVEPKPDIVENFQNFPGEGVYGRIDGQDIYIGNKRIQRAGCLTVPMEANMKRGTIGYIYIGAKLSGSFTLLD  
121 GCRYGVAQALKELKSLGIKTAMLTGDNDAAMSTQEQIENALDIVHSELLPQDKARIDEFKIQGPTMMVGDGLN  
122 DAPALAKADIGISMGISGSALATETGDIILMSNDIRKIPKGMRLAKRSHKKVIENVVLSVSIKGAIMVLGFVGY

123 LVWAAVLADAGTCLLVILNSMMLLRDEREAVSTCYRASSSSPVKLEEDEAEEDLEVGLLQKSEETSCKKSCSSGCCS  
124 GTKDNQO  
125 >AlhMA4-1  
126 MASQNKQEEKKVKKLQKSYFDVLGICCTSEVPI IENILKALDGVKEYSVIVPSRTVIVVHDSLLISPFQIGKAL  
127 NQARLEANVRVNGETNFKNKWSPFAVVGILLLLSFLKFVYSPLRWLAVAAVAAGIYPI LAKAFASIRRLRID I  
128 NILVIITVIATLAMQDFMEAAAVVFLFTISDWLETRASYKATAVMQSLMSLAPQKAI I AETGEEVEVDEVKISTV  
129 VAVKAGETIPIDGIVVDGNCEVDEKTLTGEAFVVPKQRDSTVWAGTINLNGYISVKTTSLAGDCVVAKMAKLVEE  
130 AQSSKTKSQRLIDKCSQYYTPAII VVSACVAI VPMKVHNLKHWFLALVVLVSGPCGLILSTPVATFCALTK  
131 AATSGLLIKSADYLDTL SKIKIAAFDKTGTITRGEFIVIDFKSLSRDISLRSLLYWSSVESKSSHPMAATIVDY  
132 AKSVSVEPRPEEVEDYQNFPGEGIYGKIDGNDIYIGNKRIASRAGCSTVPETEIDTKGGKTVGYVYVGERLAGVF  
133 NLSDACRSGV SQAMTELKSLGIKTAMLTGDSQAAAMHAQEQLGNVLDVVH GELLPEDKSKI IQEFKKEGPTAMVG  
134 DGVNDAPALATADIGISMGISGSALATQTGHI IILMSNDIRRIPOAVKLARRARRKVVENVFLSIVLKAGILALAF  
135 AGHPLIWA AVLVDVGTCLLVILNSMMLLLREKKKIGNKKCYRASTSM LNGRKLEGDDDDVV DLEAGLLKKSNGQC  
136 NSSCCGDKKNQEKVMMKPSKTS SDHSHPGCYGDKKQDKVKPLVRD GCCGEETRAKAVGDI I SLSSCKKSSHVKH  
137 DLKMKGGSGCCANKSEKVEEVVAKSCCEKSKQOMESAGDCKSSHCEEKHAEEI VVPVQI IGQALTGLEIELQRK  
138 EPCKTSCCDNKEEKVKEIGLLLASEDKSYPEKGVLIKDEGNCKSGCENKGTVTQRCHKEAGLDMETGVSCDLKLV  
139 CCGKTEGEVGEQTDLEIKIEGHCESRCCSDEKQTEITLASEEETDDQDCSSGCCVNEGIVKQSSHEKKHVLVE  
140 KEGLDMETGVCCDDLKLVCCGNTEGEVEEQDLEIKNEGHCKSGCCNDEKQTAETLASEEETDSTDCSSGCCMD  
141 KEEVTKICGEKPVSLVVSGLETE GGGDCKSHCCGTGLTQEGSSKLVNVE SAQSGGCGTVKVSSQSCCTSSTDLVL  
142 SDLQVKKDEHCES SNRAVKVETCCKVKIPEACASKCRERERKRHS GKSCCRSYAKEFCSHRHHHHHHHHHHHVS A  
143 >AlhMA4-2  
144 ATAVMQSLMSLAPQKAI I AETGEEVEVDEVKISTVAVKAGETIPIDGIVVDGNCEVDEKTLTGEAFVVPKQRDS  
145 TVWAGTINLNGYISVKTTSLAGDCVVAKMAKLVEEAQSSKTKSQRLIDKCSQYYTPAII VVSACVAI VPMKVH  
146 NLKHWFLALVVLVSGPCGLILSTPVATFCALTKAATSGLLIKSADYLDTL SKMKIAAFDKTGTITRGEFIVID  
147 FKSLSRDITLRSLLYWSSVESKSSHPMAATIVDYAKSVSVEPRPEEVEDYQNFPGEGIYGKIEGNDIYIGNKRI  
148 ASRAGCSTEIEVDTKGGNTVGYVYVGERLAGVFNLSDACRSGV SQAMTELKSLGIKTAMLTGDSQAAAMHAQEQL  
149 GNVLDVVH GELLPEDKSKI IQEFKKEGPTAMVGDGVNDAPALAIADIGISMGISGSALATQTGHI IILMSNDIRRI  
150 POAVKLARRARRKVVENVFLS IILKAGILALAFAGHPLIWA AVLVDVGTCLLVILNSMMLLLREKKKIGNKKCYRA  
151 STSM LNGRKLEGDDDDVV DLEAGLLTKSGNGQCNSSCCGDKKNQEKVMMKPSKTS SDHSHPGCCGDKKQDKVK  
152 PLVRD GCCGEETRAKAVGDMVSLSSCKKSSHVKHDLKMKGGSGCCANKSEKVEEVVAKSCCEKPKQOMESAGDCKS  
153 GHCEEKHAEEI VVPVQI IGQALTGLEIELQRKECKTSCCDNKEEKVKEIGLLLASEDKSYPEKVLIKDEGNCK  
154 KSGCENKGTVTQRCHKEAGLDMETGVSCDLKLVCCGKTEGEVAGKTDLEIKIEGHCESRCCSDEKQTEITLASE  
155 EETDDQDCFSGCCHGLFLGCCMDKEVTKICGEKPVSLVVSGLETE GGGDCKSHCCGTCLTQEGSSKLVNVE SAQS  
156 GCGTVKVSSQSCCTSSTDLVLS DLQVKKDEQCESSNRAVKSETCCKVKIPEACASKCKEKEKRHNKSGCCRSYA  
157 KEFCSHRHHHHHHHHHHHHH VIA  
158 >AtHMA1  
159 MEPATLTRSSSLTRFPYRRGLSTLRLARVNSFSLIPPKTLRQKPLRISASLNLPPRSIRLRAVEDHHHDHHHDD  
160 EQDHHHHHHHHHQGCCSVELKAESKPQKMLFGFAKAI GWVRLANYLREHLHLCCSAAAMFLAAAVCPYLAPEPY  
161 IKSLQNAFMIVGFPLVGV SASLDALMDIAGGKVN I HVLMALAAAFASVFMGNALEGGLLAMFNLAHIAEFPF TSR  
162 SMVDVKELKESNPDSALLIEVHNGNPNISDLSYKSVPVHSVEVGSYVVLVGTGEIVPV DCEVYQGSATITIEHLT  
163 GEVPLEAKAGDRVPGGARNLDGRMIVKATKAWNDSTLNKIVQLTEEAHSNPKLQRWLDEFGENYSKVVVVLSL  
164 AIAFLGPF LFKWPF LSTAACRGSVYRALGLMVAASPCALAVAPLAYATAISSCARKGILLKGAQVLDALASCHTI  
165 AFDKGTGLTGLTCKAIEPIYGHOGGTNSSVITCCIPNCEKEALAVAAMEKGTTHPIGRAVVDH SVGKDLPSI  
166 FVSTEFYFPGRGLTATVNGVKTVAEESRLRKASLGSIEFITS LFKSEDESKQIKDAVNASSYKDFVHAALSVDQ  
167 KVTLIHLEDQPRPGVSGVIAELKSWARLRVMMLTGDHDSAWRVANAVGITEVYCNLKPEDKLNHVKNIAREAGG  
168 GLIMVGE GINDAPALAAATV GIVLAQRASATAIAVADILLRDNITGV PFCVAKSRQTTSLVKQONVALALTSIFL  
169 AALPSVLGFVPLWLTVLLHEGGTLLVCLNSVRGLNDPSWSWKQDIVHLINKLRSQEPTSSSSNSLS SAH  
170 >AtHMA2  
171 MASKKMTKSYFDVLGICCTSEVPLIENILNSMDGVKEFSVIVPSRTVIVVHDTLILSQFQIVKALNQAQLEANVR  
172 VTGETNFKNKWSPFAVVGILLLLSFFKYLYSPFRWLAVA AVVAGIYPI LAKAVASLARFRIDINILVVVTVGA  
173 TIGMQDYTEAAVVVFLFTIAEWLQSRASYKASAVMQSLMSLAPQKAVIAETGEEVEVDELKTN TVIAVKAGETIP  
174 IDGVVVDGNCEVDEKTLTGEAFVVPKLDSTVWAGTINLNGYITVNTTALAEDCVVAKMAKLVEEAQNSKTETQR  
175 FIDKCSKYYP AII LISICFVAIPFALKVHNLKHWHLALVVLV SACPCGLILSTPVATFCALTKAATSGLLIKG  
176 ADYLETLAKIKIVAFDKTGTITRGEFIVMDFQSLSEDISLQSLLYWVSSSTESKSSHPMAAAVVDYARSVSVEPKP  
177 EAVEDYQNLPGEGIYGKIDGKEVYIGNKRIASRAGCLSVPDIDVDTKGGKTI GYVYVGETLAGVFNLSDACRSGV  
178 AQAMKELKSLGIKIAMLTGDNHAAAMHAQEQLGNAMDIVRAELLPEDKSEIKQLKREEGPTAMVGDGLNDAPAL  
179 ATADIGISMGVSGSALATETGNI IILMSNDIRRIPOAIKLA KRAKRVVENVVISITMKGAILALAFAGHPLIWA A  
180 VLADVGTCLLVILNSMMLLLSDKHKTGNKCYRESSSSSVLIAEKLEGDAAGDMEAGLLPKISDKHCKPGCCGTKTQ  
181 EKAMKPAKTS SDHSHSGCCETKQKDKVTVVKKNCAEPVDLGHGHD SGCCGDKSQOPHQHEVQVQQSCHNKPSGL  
182 DSGCCGK SQOPHQHELOQSCHDKPSGLDIGTGPKHEGSSTLVNLEGDAKEELKVLVNGCCSSPADLAITSLKVK  
183 SDSHCKSNCS SRERCHHSNCCRSYAKESCSHDHHTRAHGVGTLKEIVIE  
184 >AtHMA3

185 MAEGEESKKMNLQTSYFDVVGICCSSEVSVIGNVLRQVDGVKEFSVIVPSRTVIVVHDTFLISPLQIVKALNQAR  
186 LEASVRPYGETSLKSQWSPFAIVSGVLLVLSFFKYFYSPLEWLAI VAVVAGVFPILAKAVASVTRFRDLINALT  
187 LIAVIATLCMQDFTEAATIVFLFSVADWLESSAAHKASIVMSSLMSLAPRKAVIADTGLEVDVDEVGINTVVSVK  
188 AGESIPIDGVVVDGSCDVDEKTLTGESFPVSKQRESTVMAATINLNGYIKVKTALARDCVVAKMTKLVEEAQKS  
189 QTKTQRFIDKCSRYTTPAVVVSAACFVAVPVLKQVLDLHWFHLALVVLVSGCPCGLILSTPVATFCALTKAATS  
190 GFLIKTGDCLETLAKIKIVAFDKTGTITKAEFMVSDFRSLSPSINLHKLNNWVSSIECKSSHPMAAALIDYAVISV  
191 SVEPKPDIVENFQNFPGEGVYGRIDGQDIYIGNKRIAQRAGCLTDNVPDIEATMKRGTIGYIYMGAKL TGSFNL  
192 LDGCRYGVAQALKELKSLGIQTAMLTGDNQDAAMSTQEQLLENALDIVHSELLPQDKARIIDDFKIQGPTMMVGDG  
193 LNDAPALAKADIGISMGISGSALATETGDIILMSNDIRKIPKGMRLAKRSHKKVIENVVLSVSIKGAIMVLGFVG  
194 YPLVWAAVLADAGTCLLVILNSMILLRDEREAVSTCYRSSTSSPVKLEEDEVEDLEVGLLQKSEETSCKSCCSGC  
195 CSGPKDNQOK  
196 >AtHMA4  
197 MALQNKEEEKKVKKLQKSYFDVLGICCTSEVPIIENILKSLDGVKEYSVIVPSRTVIVVHDSLLISPFQIAKAL  
198 NEARLEANVRVNGETSFKNKWSPFAVVSGLLLLLSFLKFVYSPLRWLAVAAVAAGIYPIILAKAFASIKRPRIDI  
199 NILVIITVIATLAMQDFMEAAAVVFLFTISDWLETRASYKATSVMQSLMSLAPQKAI I AETGEEVEVDEVKVDTV  
200 VAVKAGETIPIDGIVVDGNCEVDEKTLTGAEFPVPKQRDSTVWAGTINLNGYICVKTTSLAGDCVVAKMAKLVVEE  
201 AQSSTKSQRLIDKCSQYYPAILVLSACVAIVPVMKVHNLKHWFLALVVLVSGCPCGLILSTPVATFCALTK  
202 AATSGLLIKSADYDLTSLKIKIVAFDKTGTITRGEFVIDFKLSRDINLRSLLYVWVSSVESKSSHPMAATIVDY  
203 AKSVSVEPRPEEVEDYQNFPGEGIYKIDGDIIFIGNKKIASRAGCSTVPEIEVDTKGGKTVGVYVGERLAGFF  
204 NLSDACRSGVSQAMAELKSLGIKTAMLTGDNQAAAMHAQEQQLGNVLDVVHGDLLPEDKSRIIQEFKKEGPTAMVG  
205 DGVNDAPALATADIGISMGISGSALATQTGNIILMSNDIRRIPQAVKLARRARRKVVENVCLSIILKAGILALAF  
206 AGHPLIWAAVLVDVGTCLLVIFNSMILLREKKKIGNKKCYRASTSKLNGRKLLEGDDYVVDLEAGLLTKSGNGQC  
207 KSSCCGDKKNQENVMMKPSKTSDDHSHPGCCGDKKEEKVKPLVKDGCCEKTKKSEGMVLSLSSCKKSSHVKH  
208 DLKMKGGSGCCASKNEKGEVVAKSCCEKPKQOVESVGDCKSGHCEKKQAEDIVVPVQIIGHALTHEVEIELOTK  
209 ETCKTSCCDSKEKVKETGLLLSSENTPYLEKGVLIKDEGNCKSGSENMGTVKQSCHEKGCSEKQTEINLASEE  
210 ETDDQDCSSGCCVNEGTVKQSFDEKKHSLVLEKEGLDMETGFCCDAKL VCCGNTGEVKEQCRLEIKKEEHCKSG  
211 CCGEEKQTGEITLVSEEEETSTNCSTGCCVDKEEVTQTCHKEKPASLVVSGLEVKKDEHCESSHRAVKVETCCVK  
212 IPEACASKCRDRAKRHSGKSCCRSYAKELCSHRHHHHHHHHHHHVS  
213 >BdHMA1  
214 MQSLTAPAAARPLLPRSAHLRLIPSPPPFPHLRRRCSPYLPKSLSLSSRPPLILAGRSLLFTPRAHGDHHHHHDH  
215 SHGHGHGHGHGHGVGVREGGSAAMVRFARAI GWAADALREHLQVCCISLGLLLMAAVCPHVALLSVRRLOA  
216 ALIAVAFPLVGVSAALDALLDIADGKINIHVLMALAAFASIFMGN SLEGGLLAMFNLAHIAEYFTSKSMYDVR  
217 ELKENHPEFALLLETSGDESAQFSNLSYTKVPVHDLEVGSILVRAGEAVPVDGEVYQGSSTVTIEHLTGETKPL  
218 ERAVGDSIPGGARNLEGMIVKVTKSWEDSTLNRIVQLTEEGQLNPKLQRLWDEFGEHYSKVVVALSLVVALLG  
219 PFLFKWPFVFGNSVCRGSIYRGLGLMVAASPCALAVAPLAYATAISSLASKGILLKGGHVLDAALSACQSI AFDKTG  
220 TLTTGKLMCKAIEPIHGHGLGVNNGLNTHSCCTPNCESEALAVAAAMEKGTTHPIGRAVLNHSVGRDLPVAVESF  
221 ESLPGRGVVATLSGIKARNTENELAKASIGSVEYISSLYRSNGESEQIKEAVKSSAFGPEFVQAALSVDKKTFL  
222 HFEDPRIGVCEVIYTLREKAKLRIMMLTGDHESALRVAKAVCIDEVHWSLKPEDKLNKVKAVSREGGGLIMV  
223 GDGINDAPALAAATVGI VLAQRASATAVAVADVLLQLDNL CVVPFCIAKARQTTSLVKQSVLALATCIVFAALPS  
224 VLGFPLWLTVLLHEGGTLLVCLNSIRALNPPTWSWADDIRQLFDAIRKFMSEKLNSSSSNSFSAKTVP  
225 >BdHMA2  
226 MGDDAAVPAAAAKLEKSYFDVLGICCPSEVPLVEKLEPLAGVHKVTVVVPVSRVIVVHDAAAISQSQIVKALNQ  
227 ARLEASVRAYGGGGGAEKISNKFPSYVLVCGALLVLSLFEHFWPPLKWFALAGAAAGLPPIVLRSVAAAARLTL  
228 DVNILMLIAVAGAIKLDYSEAGFIVFLFTTAEWLETTRASRKATAGMSSLMSMAPQNAVLAETGQVATQDVKVN  
229 TVIAVKAGEVVPIDGVVVDGRSEVDESTLTGSEFPVSKQADSQVWAGTLNIDGYIAVRRTAMADNSAVAKMARLV  
230 EEAQNSRSNTQRLIDTCAKYTTPAVVLMGSAVALIPVIVRAHNLKHWFLALVLLVLSACPCALVLPVATFCAL  
231 LRAARTGLLIKGGDVLESASIKVAAFDKTGTITRGEFSVEEFRTAGERVPKQKLLYVWSSIESRSSHPMASALV  
232 DHAQNSVEPKSENVTEFQIYYPGEGIYGEIDGKGVYVGNKRLSRASCQTVPMKMDKGVTVGVVCSKELIGVF  
233 TLDSDCRTGAAEAIKELRSLGIKSVMLTGDSTAAATYAQNQLGNLLAEVHSELLPEDKVRIVDELKAKDGPTLMI  
234 GDGMNDAPALAKADVGVSMGVSGSAVAMETSHITLMSNDIRRIPKAIKLARRTHRTIIVNIVFSVATKLAIVGLA  
235 FAGHPLIWAAVLADVGTCLLVIMYSMILLREKSGKVAKKCCASSHHGSHSKKHGTSHHCSDGPCRSTGSGVDSS  
236 AGKHACHDHHHEHNHKEPRNLHSADKHGCHDHSNHCKEPSNQMF TSMHASHGHEHTQNICKEPSNPSSNK  
237 HDCHDHEHGHREEPSGSHSTKELACHGHAHGHCEETKSSHSTDEHACHDHKCEEPISLHCANEHVCHDHDQDDH  
238 QHHCCDEQEPLHTADTHSCHDHKHEDSSAGSIQEFSSISIEDASHDHHEKQSQCGHQSEEPKERDCRHHQKAKDCA  
239 PAPTDCSSINCCSTISIKGCEMKGKDICSSWQVGGIGTGSRCRTRVRNCCSHSMLKLPEIVVE  
240 >BdHMA3  
241 MSGGELRRGALESLLLTGRQWDKTYLDVLGVCCSAEVALVERLLSPLAGVRTVSVVVPVSRVIVVQHDPAAVSQ  
242 SHIVKVLNAGLEASVRAYGSSGIISRWSPYILASGVLLASSLSWLLPDPLHLLQWLALAAAFAVGPMLLRG  
243 FAAASRLTLDINVLMLIAVAGAAALGDYTEAGAVFLFTTAEWLET LACTKASAGMSSLMSMIPPKAVLAETGQV  
244 VNVSDIGVGAVVAVRAGEVVPVDGVVVDGQSEVDERSLTGESYPVPKQPQSEVWAGTLNLDGYIAVRTSALAENS  
245 TVARMEKLVVEEAQNSRSKTQRLIDSCAKYTPAVVVMGAGVALPPLL LAGDPERWFRSLVLLVLSACPCALVLS  
246 TPVATFCALLTAARMGVLIKGGDVLESLEITAVAFDKTGTITRGEFSIAAFHVVDKQVITHLLYVWSSIESKS  
247 SHPMAAALVEYARSKSIQPKPENVAEFRVIPGEGVYGEIHGRHIYIGNKRAALARGSCHTVPKKGDLKGVSVG

248 YVICDGLVGFSLSDDCRTGAAEAIQELTAMGIKSVMLTGDSAEAAAHAQEQLGGALEELHWDLFPEDKVRLVA  
 249 ALKARAGPTMMVGDGMNDAPALAMADVGVSMGVSGSAAAMETSHATLMSDDVLRVPEAVRLGRRARRTIAVNLVA  
 250 SVGIKAAVLVLAVAWTPALWAAVLADVGTCLLVVLNSMRLLEGNGRGGGGKKKEEACRATARSLMRRRAQLLLN  
 251 ADDASNAASTTVVVERPGGGGREGKCHCCHRENESPESSVAIDIIRVDERPEEVKIAACAPAKGGADA  
 252 >BrHMA1-1  
 253 MEPAALTRSSSLTRFPYRRGLATLRLARVNSFSILPPKTPPLPLRISASLSLPRQSIRLRAVEDHHHDHHDHHDGE  
 254 QEQHSHHHHHHGCCSVELKAESKPQKALFGFAKAIGWVRLANFLREHLHLCCSSAALFVAAAACPYFAPKPYVKS  
 255 LQHAFMIVGFPLVGVASLDALMDIAGGKVNIVHLMALAAFASVFMGNALEGGLLLAMFNLAHIAEEFFTRSRSMV  
 256 DVKELKESNPDSALLIEVKNGNPNISDLSYKSVPVHSVEVGSYILVGTGEIVPVDCQVYQGSATITIEHLTGEV  
 257 KPLEAKAGDRVPGGARNLDGRMIVKATKAWNESTLNRIVQLTEEAHSNKPKLQRWLDEFGENYSKVVVVLSLAIA  
 258 FLGPFLLFKWPFLLSTTACRGSVYRALGLMVAASPCALAVAPLAYATAISSCAKKGILLKGAQVLDALASCHTVAFD  
 259 KTGTLTTGGLTCKAIEPIYGHGGNNPSVITCCVPNCEKEALAVAAAMEKGTTHPIGRAVVDHDSVKGDLPSIFVE  
 260 SFHEYFPGRLTATVNGVESVAEASRLRKASLGSIEFITSFLKSEDESSQIKDAVNASLYGKDFVHAALSVDHKVT  
 261 LIHLEDQPRPGVSGVIAELKNWAQLRVMMLTGDDHSSAWRVANAVGISEVYCNLKPEDKLNHVKNIARDAGGLI  
 262 MVGEGINDAPALAAATVGIVLAQRASATAIAVADILLRDNITGVPPFCVAKSRQTTSLVKQONVALALTSIFLAAL  
 263 PSVLGFLPLWLTVLLHEGGTLLVCLNSVRGLNDPSWSWKQDIAHLVNLKSSRESTSSNNSLSSVETAH  
 264 >BrHMA1-2  
 265 MEPTAFTHSSSLTRFPFLKATLRLNSLLLOPTTLP IHTSPRRSVHLLTKSACENSHHHHHHEHEDHSHHHHHHR  
 266 HCCSVGQTSNYPQKVLIEFAKAIGWIRLANFLREHLHLCCSSAVLFIAAAACPYLIPKPYIKPLQNSFMIVAFP  
 267 FVGVASLDAIMDVAGGKVNIVHLMALAAFASVFMGNALEGGLLLSMFNLAHIAEEFFTRSRSMVDVKELKESNPE  
 268 TALVIDVDNDNPNFFDLSYKSVHLHNVEVGSYILVGTGEIVPVDCQVYQGNATITVEHLTGEVVKPLEAKAGERV  
 269 PGGARNLDGRIIVKVMKAWNESTLNRILQLTEEANSNKPKIQRWLDEFGEIYSKVVVVLVSVIAFLGPVFFKWP  
 270 LSTIACRGSVYRALGFMMAASPCALAVAPLAYATAISSCARKGILLKGGQVLDALASCHTIGFDKTGTLTTGGLT  
 271 CKAIEPIYGHHEGNASVTPCCIPNCEKEALAVVAAMEKGTTHPIGRAMVDHDSIGKDLPSVSVESFEYFPGRLT  
 272 ATVNCVQSVTDESKVQKASLGSVEFITSFLKSDQESRKIKDAVNSSSYGNDFVHALLSLDQKVTLIHLEDQPRPE  
 273 VPKVIAELKSWGRLRIMMLTGDHSSAWRVANAVGIDEVYCNLKPEDKLNHVKNISRDSGGGLIMVGEINDGPA  
 274 LAAATVGFVLAQRASGTAIAVADVLLLRDNITGVPPFCIAKSRQTTSLVKQONVAIALTSILLAALPSVLGYLPLWL  
 275 TVLLHEGGTLLVCLNSIRGLNDPS  
 276 >BrHMA2  
 277 MASKNDKMTKSYFDVLGICCTSEVPLIENILKSLDGIKKYSVIVPSRTVIVVHDSLIIISQFHIVKALNQRLEA  
 278 NVRVTGETNFKNKWSPFAVVSGLVLLLSFFKYLYSPFRWLAVAAVVAGIYPIILAKSIAIARTRIDINLVVIT  
 279 VGATLGMQDYTEAAAVVFLFTIAEWLQSRASYKASAVMQSLMSLSPQKAVIAETGEEVEVDELKINTIIAVKAGE  
 280 TIPIDGVVVDGNCEVDEKTLTGEAFVPPKLRDSTVWAGTINLNGYITVKTTLAEDCVVAKMAKLVEEAQNSKTE  
 281 TQRFIDQCSKYYPAAIIIIISLCFVVIIPFALKAHNMKHWLHLALVVLVSACPCGLILSTPVATFCALTKAATSGLL  
 282 IKGADYLETLAKIKTVAFDKTGTITRGEFIVTDFKISIRDISLHSLLYWVSSVESKSSHPMASALVDYAKSVSVE  
 283 PKPEAVEDYQNFPEGIYKIDGKEVYIGNKRIASRAGCSTVPDTPDVTGKGTGVYVYVGETLAGSFNLSDACR  
 284 SGVAQAMKELKSLGIKTAMLTGDNQAAARHAQEQQLGNAIDIIHAELLPEGKSEIKKFKREGPTAMVGDGLNDA  
 285 PALATADIGISMGISGSALATETGNIILMSNDIRRIPQAIRLARRAKRKYVENNVLSITMKGAILGLAFAGYPLI  
 286 WAAVLADVGTCLLVILNSMMLLRDKQKGGNKCYRSSSPCVLNAEKHEGDAAGDMEAGLLPPTRSKDKCKSSCCG  
 287 KKNREKVMKPHHGHSGCCDKKQKDNVIVRKS CDSCGCGSGNKTQQPDQDEGCHDMPSEEIRLDVGDGGDCKSVC  
 288 CGTGTIQQEGSSNLVNVGDGEVKS SVKCCSRPAEHVVASLKVKSNGHCESKEDKEETCSEVKMNCGRSRERSSH  
 289 DHHHA  
 290 >BrHMA3-1  
 291 MADGEDTTKKNLQTSYFDVVGICCSMEVPLVGDVLRPLNGVKEFSVIVPSRTVIVVHDSFLISPLQIVKALNEAR  
 292 LEASVRPYGETSFKSQWSPFALVSGVLLALSFLKYFYGLEWFAVVAVVAGVYPIILAKAVASVTRFRDINALT  
 293 LITVIATVCMEDYTEAATIVFLFSVADWLESSAAHKASTVMSSLMNLAPRKAVIVETGIEVDVDEVGLNTVVSVK  
 294 AGESIPIDGVVVDGSDVDEKTLTGESFPVSKQRDSPVLAATINLNGYIKVKTTLVLRDCVAVAKMTKLVEEAQKS  
 295 QTKTQRFIDKCSRYYPVAVVVAAACFALIPVLLKAQNLSHWFHLALVVLVSGCPCGLILSTPVATFCALTKAATS  
 296 GFLIKTGDCLLETAKIKIAAFDKTGTITKAEFTVSDFFQSLSHNINLQHLIYWVSSIESKSSHPMAEALIDYARSV  
 297 SVEPKPDMVENFQNFPEGVYGRIDGQDIYIGNKRIAKRAGCLTVPDSEADMKGKGTIGYIYIGEELTGSFSLLD  
 298 GCRHGVAQALKELKFLGITAMLTGDNRDAAMSIQQQLGNALDIAHTELLPQDKARIIDEFKSOQPTMMVGDGLN  
 299 DAPALAKADIGISMGISGSALATETGDIILMSNDRKIPKGMRLARRCHKVIENVVLSVSIKGAIMVLGFAGY  
 300 LIWAAVLADAGTCLLVILNSMMLLRDEREAVSACYRASPSCTPSLLKLEEDLEVGLLQKSEETSNSKSCCSGCCG  
 301 GPKGTQOK  
 302 >BrHMA3-2  
 303 MANVEETTKKKNLQTSYFDVVGICCSSEVSLVGEILRPLDGVKEFSVIVPSRTVIVVHDILLISPLQIVKALNKAR  
 304 LEASVRPYGETSLTSQWSPFVAVVSGVLLALSFLKYFYSPLWFAVVAVVAGVFPILAKAVASVTRFRVDINALT  
 305 LITVIATVCMEDYTEAATIVFLFSVADWLESSAAHKASTVMSSLMNLAPRKAVIAETGQEVDDVVGINTVVSVK  
 306 AGESIPIDGVVVDGSDVDEKTLTGESFPVSKQRDSTVLAATINLNGYIKVKTTLALRDCVAVAKMTKLVEEAQKS  
 307 QTKTQRFIDKCSRYYPVAVVVAAACFAVIVPVLKQNLSHWFHLALVVLVSGCPCGLILSTPVATFCALTKAATS  
 308 GFLIKTGDCLLETAKIRISAFDKTGTITKAEFTVSDFKSLSPNINLKTLLYWVSSIESKSSHPMAAALIDYARSV  
 309 SVEPTPDRVENFQNFPEGVYGRIDGQDIYIGNKRIAQRAGCLSTVPGIEANMKRGTIGYIYIGEELTGSFNLL  
 310 DGCRHGAAQALQELKSLNIKTAMLTGDNRDAAMSIQEQLGDALDIVHAELLPQDKARIIDEFKSOQPTMMVGDGL

311 NDAPALAKADIGISMGISGSALATETGDIILMSNDINKIPKGMRLARRSHRKVIENVVLSVGIKGAIMVLGLVGY  
 312 PLIWA AVLADAGTCLLVILNSMMLLRDEREAAPVCYRASPLSPVKLEPEVEDLEVGLLQKSGETS KSKSCCSGCC  
 313 SGPKDKQTGDLESF  
 314 >BrHMA4-1  
 315 MATKNEKMTKSYFDVLGICCTSEVPLIENILNSLDGVKEYSVIVPRTVIVVHDSLIIISQFNIVKALNQARLEA  
 316 NVRVTGETNFKNKWPSPFAVVSGVLLLLSFFKYVYSPFRWLAVA AVVAGIYPIILAKSVAS IARARIDINILVVIT  
 317 VGATLGMRDYTEAAAVVFLFTIAEWLQSRASYKASAVMQSLMSLAPQKAVIAETGEEVEVDELKINTVIAVKAGE  
 318 TISIDGVVVDGNCEVDEKTLTGEAFVVPKLRDSTVWAGTINLNGYITVKTTALAEDCVVAKMAKLVEEAQNSKTE  
 319 TQRFIDECSKYYPATPAIILISLFCFVVPFALKVHNMKHWLHLALVVLVSACPCGLILSTPVATFCALTKAATSGLL  
 320 IKGADYLETLAKIKTVAFDKGTITRGEFIVMDFKLSRDISLSLWVSSVESKSSHPMAAALVDYAKSISVE  
 321 PKPEAVEDYQNFPGEGIHGKIGGKEVYIGNKRIASRAGCSSVPDIDVDTKGGKTVGYVYLGETLAGVFNLSDACR  
 322 SGVAQAMKELKSMGIKTAMLTGDNQASAMHAQEQLGNVMDVVHAELLPEGKSQI I KEFKREGPTAMVGDGLNDAP  
 323 ALATADIGISMGVSGSALATETGHIILMSNDIRRIPOAIRLARRGKRKVVENVVLSITMKGAILALAFAGHPLIW  
 324 AAVLADVGTCLLVILNSMMLLRDVHVPGGKCHRAEKGACDVGDM EAGLLPKHCKSGCCGKKNQQEVMKLDK TSE  
 325 GHGHSGCCDKKREDKVMIVRKRCE SRCCGDKIQQRDQDEVKQSCHNKAGDTEEIRLDISVKGCCSRPVADPVVAS  
 326 DGHRESSCESSRKNNEEACCEVETNESNCSSREKHHSHCHSHHHE  
 327 >BrHMA4-2  
 328 MVAVKALNQARLEANVSVTGETNFKNKWPSPFAVVSGVLLLLSFFKYVYSPFRWLAVA AVVAGIYPIILAKSVAS I  
 329 ARARIDINILVVITVGATLGMRDYTEAAAVVFLFTIAEWLQSRASYKASAVMQSLMSLAPQKAVIAETGEEVVD  
 330 ELKINTVIAVKAGETIPIDGVVVDGNCEVDEKTLTGEAFVVPKLRDSTVWAGTINLNGYITVKTTALAEDCVVAK  
 331 MAKLVEEAQNSKTETQRFIDECSK\*YTPAIIILISLFCFVVPFASKVHNMK\*HLALVVLVSACPCGLILSTPVA  
 332 TFCALTKAATSGLLIKADYLETLAKIKTVAFDKGTITRGEFIVDFKLSRDISLSLWVSSVESKSSHPM  
 333 AAALVDYAKSVSVEPEPEAVVDDQNFPGEGIHGNIDGKKVYIGNKRIASRAGRSSGPDIDVDTKGGKTVGYVYV  
 334 ETLAGLFNLSDACRSGVAQAMKELKSMGIKTAMLTGDNQAAAMYAEQLGNVMDVVHAALLPEGKSQI I KEFKRE  
 335 GPRAMVGDGLNDAPALATADIGISMGVSGSALATETGHIILMSNDIRRIPOAIRLARRGKRKVVENVVLSITMKG  
 336 AILALAFAGNPLIWA AVLADVGTCLLVILNSMMLLRDAHVPGDKCHRAEKHEGDVVGDM EAGLLPKHCKSGCCGK  
 337 EKQEVVMKPAKTI SGHGHSGCCDKKHVDVMIVRKCESRCCGDKIQQQPNQDEVKQSCHNKAGELKEIRLDLGD  
 338 SDCKSGSPLVKGCCSRPDADPVVASLKVKSDGSCSESSRQR  
 339 >CpHMA1  
 340 METAVLHHP IGLTKFPLSRPARTSPVNSPKLVLHHQFPQFHFDSPNFHRLIVHCVAQASNNHRRNHRDQHHSHE  
 341 HTHHDHVGAAHNHNHNDHHHHHHGGTQELRGPORALIGFARTIGWVHLANFLREHLQLCCATALFLAAAACPYL  
 342 VPKPAVKSLQKTFIFIGFPLVGVSAALDALDLAGGKVN IHVLMALAAFASIFMGNSLEGGLLLAMFNLAHIAEE  
 343 FFTSRVVDVKELKENYPNSALVLDVNDENL PNTSDLSYRSIPVHDVEVGSYILVGTGEAVPVDCEVYQGGATIT  
 344 IEHLTGEIKPLEAKVGDRIPGGARNLDGRMIVKATKTWKDSTLSKIVQLTEEAQSNKPKLQRWLDEFGENYSKV  
 345 VVLSVAVALLGPFLFKWPFISTASRGSYRALGLMVAASPCALAVAPLAYITAISSCARKGILLKGGQVLDALA  
 346 SCHTIAFDKGTTLTGGLMFKAIEPIYGHHIRKNASSFTACCTPDCEKEALAVAAAMEKGTTHPIGRAVVDHSIG  
 347 KDLPSVSVESFECFPGKGLVATLLGAESGTGAVRSLKATLGSVEFITS LCKSEDESRIKEAVNASSYGSDLVHA  
 348 ALSVDKKTILHLEDPRPRGVSDVIAELKNQAKLRMLMMLTGDHESAWRVANAVGINEVYCSLKPEDKLNHVKSI  
 349 SRDMGGGLIMVGEINDAPALAASTVIGIVLAQRASATAIAVADVLLLRDNISGVPFCIAKSRQTTSLVKQNVALA  
 350 LSAIVLASLPSVMGFLPLWLTVLLHEGGTLLVCLNSVRALNDPSWSWKQDLGHVVNEFKSRLLPPTKNPTSSSTN  
 351 QPAAL  
 352 >CpHMA-A  
 353 MASAGEMKTKRYSYFDVLGLCCPSEVPMIENILNSLDGVKEYSVIVPRTVIVVHDNLLLSQHQIVKALNQGGLE  
 354 ANAIAYGETKYKKKWPSPYAVASGLLLCLSFLRYVYSPLRWLAVA AVAAGGVPILLKALASIRNLRIDINILAI I  
 355 AGIGTIYMKDYTEAATIVFLLNISEWLESRASHKANAAMSSLMNLAPQKAI I AETGEEVD TDEVKLN TILAVKTG  
 356 EVVPIDGIVVDGNAEVDEKTLTGESFPVPKQK DSTVWAGTINLNGYISVKTALAEDCVVAKMTKLVEEAQNSKS  
 357 RTQRFIDRCRYYTPGILII SASLAVIPAVLRVHDMKYWIHLALVVLVSACPCALILSTPVVTFCALTRAASSGL  
 358 LIKGGDYLEVLAKIKVTAFDKGTITKGEFTVMDFQSLTRDISLNTLLYWVSSIESKSSHPMAKALVDYGMSQLV  
 359 TPNPESVEDYQNFPGEGIHGKIDGKDIYIGNRKIGVRAGCSSVPVTEGDTKGGKTI GYIYCNSSLVGI FSLSDTC  
 360 RTGVVEAIKHLKLLGIKSVMLTGDSQAAAMHAQEQLGNALEIVHSDLLPEDKARI INELKKELGATAMIGDGVND  
 361 APALATADIGISMGISGSALATQ TGHIIILMSNDIRKIPKAI RLVKARRKVIENVILSIIITKAGI IALAFAGHPL  
 362 VWA AVVADVGTCLLVILNSMMLIRTPAKNPKSSSHTNHNCSSKNLQNHSHSHKTCNSKSKQPKSCTKSSNHHGH  
 363 NHGTCNNHDDHHGHNHGICNNHDDYHGRNHRTCNNQDDHHGHNP GTCNNQDDHQGHSRRTCNNHDDHHGHNHGTC  
 364 NNQDDHQGHSRRTCNNHDDHHGHNHGTCNNHETHEHKHGCSGTHHLLTSCKQDNASTHDHNVGLHHLEEGTSLN  
 365 NNNGLCKHKHCDHNINQVSDHEKLSMAAIKQICCAQNDHDQCP EEKSDHVHSHDHVVMCDYDPAGMAHGGSHGC  
 366 VRLERREYGGCRSYLKECCNNHGHFGVGMGGLTEIVTE  
 367 >CsHMA1  
 368 MDTLFPVPI TFSELPHPLLT CNTNAASQSRVGPVSRFSPLSSLIHLNRFPTRFKKLSYPRFGHFRCAAEASGHRHG  
 369 HHHGHHHHHHGCHHSGDSDGVELTGAQKAFVRF AEAIRWTDLANYLREHLHMCCGSAAALFVTA AAFPYLVPKP  
 370 AVKPLQNVFIAVAFPLVGV SASLDALTDISGGKVN IHVLMALAAFASIFMGNPLEGGLLLVMFNMAHIAE EYFTK  
 371 QSMIDVKELKESHPDFALVLDVNDNL PDTSDLEHRRVPVRDVKVGSYILVGAGESVPVDCEVYQGCATITVEHL  
 372 TGEVRPLQIKVGERVPGGARNLDGRIIVKATKTWEESTLSRIVQLTEEAQLNKPKLQRWLDEFGENYSKVVVLS  
 373 VAVALIGPLLFKWPFICTPGFRGSYRALGLMVAASPCALAAAPLAYAIAISSCARKGILLKGGHVL DAMASCHT

374 VAFDKTGTLLTTGGLVFKAIIEPIYGHKIGGDKSQFASCCIPSCKEALAVAAAMEKGTTHPIGRAVVDHDSVKGDLF  
375 SISVESTHEYFPRGLIATLHGKIGSGIGKLRKASLGSVDFITSFCKSENE SRMIKDAVRASYGSEFVHAALSVD  
376 QKVTLIHLEDQPRPGVIDAIAELQHLGKLRVMMMLTGDHDSAWKVANAVGINEVYYSLKPEDKLAHVKEISREMG  
377 GGLIMVGEINDAPALAAATVGI VLAHRASATATAVADVLLQLQDSISGVPFCIAKSRQTTSLIKQNVTLALTSIL  
378 LASLPSVLGFLPLWLTVLLHEGGTLLVCLNSVRALNHPSSWSWKQDLQNLIH DARSKLNTPPENSSGTIQATATS  
379 **>CshMA-A**  
380 MSEEATEKMNKKVIKENKKMERSHFDVLGICCSSEIPLIENILKPLQGIKQITVIVPRTTLIVVHDSLLISQLQI  
381 VKALNEARLEANIQLKGGKIMKKKWPSPIYASGLLLTASFLKYVYHPLRWLAVAAVAAGIFPILLKAI SAIRHL  
382 RVDVNI LAIIAVVGTIAMDDYMEAGSIVFLFSIAEWLESRASHKANGAMCSLMRLAPQKATIAESGEVVDVRDVK  
383 LKSVLGVKAGEVIPIDGIVVEGNCVDEKTLGSETFPVTKQKDSLWVWAGTINLNGYISVQTTVVAEDCVVAKMAE  
384 LVEEAQNNKSKTQTFIDECAYYTPAVV IISACLAIPAALRVHNLRHWHLHLLVVLVSACPCALILSTPVA AFC  
385 ALTKAAMAGVLIKGGNHLEVLAKIKVMAFDKTGTITRGEFVVTHTFQALRDDINFHTLLQWVSSIESKSSHPMATA  
386 LVNYGKLSIDLKPENVEEFENFLGEGVRGKIDGNDIYIGSKKIAARAGYDIPVSSKLNNDDETRQEQTLGYVF  
387 CGGMMIGSFGLLDSCRSGVKEAIEEIKSFGIKTAMLTGDCRAAMHVQEQLGNTLDVIHSELLPKKANI I KEFK  
388 NNDGAIAMVGDGLNDTPALATADIGMSMIGISGSALATETGNVILMSNDMRKIPKAIKLAKTFHTKVVQNVILSIG  
389 TKTAILGLAFAGHPLIWA AVLADVGTCLLVILNSMMLLRGMDHKGKCKSSKPCCLKHGQLCDGARSSHHHS  
390 HHHDDHDDHDDHNRCHVDDQASQENNHVHKHCCEEKDHKMQLSQDHNKETCGVLNQEKNHECGEHECEET  
391 NVHHKEDKFFHNNYSNQCEKTPLEIREIRGNSSKRVGKSDCNCHSHHVTIDIHESNECERVDHN  
392 **>CshMA-B**  
393 MAATEAEGNKGGGLKKSDFVLDGICCSSEIPVIENILKDIEGIEKIRVIVATRTVIVLHDDLLVSQAQIVKALNQ  
394 ARFEANVRAYGDQKDRKWPSPYAVASGLLLLLSLLKYVNP IFRWVALAAVAAGILP IVLKSF AAVRHLRIDIN  
395 ILALIAVIGTIVLKDYLEAATIVFLFTIAEWLESRAAHKANAVMSSLLSIAPQKAVLADTGEVVGADDEVKLG TLL  
396 AVKAGEDIPIDGIVVEGKCEVDEKTLTGESFPVPKQKNSTVWAGTINLNGYVTVKTTALAE DCVVAKMAKLV EEA  
397 QNNKSRQRFIDKCAKFTPAV I IISTCIVVIPLALRPNRSHWFHLALVVLVSACPCALILSTPVASFALTKA  
398 ATSGLLIKGGDYLETLGKIKIMAFDKTGTITRGEFMVTEFQVLDKDNISLDTLLYWVSSIESKSSHPMAALVDH  
399 GRSLSIDPKPENVD DQNFPGEGVHGRIDGKDIYIGNRKIATRANCATVPEIKDEAKDGRVGYIFCGTIAAGVF  
400 SLSDSCRTGAKEAMDELRS LGIKTAMLTGDSAAALQAQKELGKALQAVHAELL PQDKTRLINDFKKEGPTAMIG  
401 DGLNDAPALATADIGISMGISGSALAIETGDVILMTNDIRKVPKAI RLARRANNKVIENVILSVVPR IAILGLAF  
402 GGHPLVWAAVLADVGACVLVILNSMMLLRGTGDGHKGGKAGKFSATHGSSKHKCHVSSHSD ECGSHTHDGHCNHR  
403 SSHSSSHSHHHHHHEHEHEDCGSLKNTHDGLQKSNHPSMCD SKLKNSSSCKKSKLMNPSSKIDGSTGCVKLC EHD  
404 HTHDHGCSDFGSSSHSHHHHHHEHEDCHSLEKTHDVCLPQN HASKCDRSKNLSSFNKGIHDCSCKVDG  
405 STGSVQLCEHDMHDGHCNTDSTDSSSHSHHHHYEHEDCGSLK KTHDGCVLQNCASKCDSGMKS SSSCKSLVD  
406 SSSKVVDSASSLKPCHEGHC IENDQPAEHDHHPYSSCTDHHAKDEL CSPENTQEFCSFQK CASNSCEKIKCTSSPA  
407 SHDGS AVIVELDESGCCTHNTQSAQHDDI QSPKCDFFDSSHSPSLEHHISNGCCSQKNTHKDFL SHPMRDSETCK  
408 EGVHLHCKASNE DNGAINNTVNIKLEADHSNSKRGN TSNKPMENRETNNCKSCRRGSSQFKIGKSCAGLNKREV G  
409 GCCKSYMKECCRKHGDIRMAVRGGLNE I I I E  
410 **>EphMA1-1**  
411 MEPAILSRSSSLTRFPFRGGLATLRLARVNSFSIFPNTLLRRKPFHLRISASLSLPRQSIRLRAVEDHHHDDHHH  
412 DSEQEHHHHHHHQHGCCSVELKAESKPQKVLFGFAKAI GWVRLANFLREHLHLCCSSAALFLAAAACPYFAPK P  
413 YIKSLQNAFMIVGFPLVGV SASLDALMDIAGGKVINHVLMAAFAFASVFMGNALEGGLLAMFNLAHIAEEFFTS  
414 RSMVDVKELKESNPDSALLIEVKNGNVPNVSDLSYKSVPVHSVEVGSYILVGTGEIVPVDCQVYQGSATITIEHL  
415 TGEIKPLEAKAGDRVPGGARNLDGRMIVKATKAWNESTLNRIVQLTEEAHSNKPKLQKWLDEFGENYSKVVVVL S  
416 LAIAVLTGFLFKWFLSTTACRGSVYRALGLMVAASPCALAVAPLAYATAISSCAKKGILLKGAQVLDALASCHT  
417 VAFDKTGTLLTTGGLTCKAIEPIYGHGGSNSVPTCCPVNAKEALAVAAAMEKGTTHPIGRAVVDHDSVKGDLPS  
418 IFVESFEYFPRGLTATVNGVESVAEESRLRKASLSIEFITSLFKSEDESKQIKDAVNASLYGNDVFHAALSVD  
419 QKVTLIHLEDQPRPGVSGVIAELKSWAQLRVMMMLTGDHDSAWRVANAVGIT EYVCNLKPEDKLNHVKN IARDAG  
420 GGLIMVGEINDAPALAAATVGI VLAQRASATAIAVADILLRDNISGVPFCVAKSRQTTSLVKQNVALALTSIF  
421 LAALPSVLGFLPLWLTVLLHEGGTLLVCLNSVRGLNDPSWSWKQDIAHLINKLSSRESTSSNSSLS SIEPAH  
422 **>EphMA1-2**  
423 MEPAALLHSSSPLNRFPFPVKATLRFARLNSFLLLQPTTFPIRTSSSFRLPKRSIRLLTKSACENHSHDHHHHHHH  
424 HHHHEHEHKQDDHHHHHHHHHRHCCSVGITVSSYPQKVLINFAKAI GWIRLANFLREHLHLCCSSAVLFI AAAAC  
425 PYLIPKPYIKPLQNSFMIVAFPLVGV SASLDALMDIAGGKVINHVLMAAFAFASVFMGNALEGGLLAMFNLAHI  
426 AEEFFTSRSMVDVKELKESNPDSALVIDVKNVNPFFDLSYKSVHVNVEVGSYILVGTGEIVPVD CQVYQGN A  
427 TITIEHLTGEV KPLEAKAGDRVPGGARTLDGRIIVKATKAWNESTLNRILQLTEEA NSNKPKLQRWLDEFGEVYS  
428 KVVVLSVSI AFLGPVLFKWPFLGTAACRGSVYRALGLMVAASPCALAVAPLAYATAISSCARKGILLKGGQVLD  
429 ALASCHTIGFDKTGTLLTTGGLTCKAIEPIYGHGAGSITPCCMKIFEKEALAVVAAMEKGTTHPIGRAMVDHDSVKG  
430 DLPSVSVESFEYFPRGLTATVNCIESVSEDSKLQKASLSVEFITSLFKSQDESRKIKDAVNSSSYGNDVFH AV  
431 LSLDQKVTLIHLEDQPRPEVSKVIAELKNWGRRLIMMLTGDHESALRVANAVGIDEVVCNLKPEDKLNHVKNIS  
432 RDSGGGLIMVGEINDGPALAAATVGI VLAQRASGTAIAVADVLLLRDNITGVFPFCIAKSRQTTSLVKQNVAI AL  
433 TSIFLAALPSVLGFLPLWLTVLLHEGGTLLVCLNSIRGLNDPSWSLQKD IARVISNFNRRRSISHTNCVCTTEK  
434 **>EphMA2**  
435 MASKNEKMTKSYFDVLGICCTSEVPLIENLLNSLDGVKEYSVIVPSRTVIVVHDSLII SQFHIVKVLNQARLEA  
436 NVRVTGETNFKNKWSPFAVVSGLVLLLSFFKYVYSPFRWLAVAAVAGIYPILAKSVASIASRRIDINILVVI T

437 VGATLGMRDYTEAAAVVFLFTIAEWLQSRASYKASAVMQSLMSLAPQKAVIAETGEEVEVDDLKISTVIAVKAGE  
 438 TIIPIIDGVVVDGNCEVDEKTLTGEAFVVPKLRDSTVWAGTINLNGYITVKTTALAEDCVVAKMAKLVEEAQNSKTE  
 439 TQRFIDECISKYYPPIIIISLFCVVVPPFALKVHNMKHWLHLALVVLVSACPCGLILSTPVATFCALTKAATSGLL  
 440 IKGADYLEILAKIKTVAFDKTGTITRGEFIVMDFKLSRDISLQSLVYVWSSVESKSSHPMAAALVDYAKSVSVE  
 441 PKPEAVEDYQNFPGEGIYGKIDGKEVYIGNKRIANRAGCLSVPDIDVDTKGGKTIYVYVGETLAGIFNLSDACR  
 442 SGVTQAMKELKSLGIKTAMLTGDNQAAAMHAQEQLGNAMDIVRAELLPEGKSEIIEKFKREGPTAMVGDGLNDAP  
 443 ALATADIGISMGISGSALATETGHIILMSNDIRRIPOAIRLARRAKRVVENVALSITMKGAILALAFAGHPLIW  
 444 AAVLADVGTCLLVILNSMMLLRDKQKTGNKCYRSSSSPPVLNAEKHEGDVARDMEAGLLPKSSDKHCKSGCCGKK  
 445 NQEKEMKPAKSSDHSHGSCCDKKQKDNVIVRKDCDSGCCGNKIPQPHQDEVKQGCQNKPGVLEEIVLDVGDGD  
 446 CKSVCCEAGSIQEGSSTLVNLDEEVKVSAGCCSRPADPVVANLKVKSDGHCESTCSEVKTKEACKSDCSGREKS  
 447 HSHHHHHHHHHA  
 448 >EphMA3  
 449 MADGEETANKNLQTSYFDVVGICCSSEVSLVGDILRPLDGVKEFSVIVPSRTVIVVHDILLISPLQIVKALNQAR  
 450 LEASVRPYGETSFKSQWSPFALVSGVLLALSFLKYFYSLLGWFVAVVAVAGIFPILSKAVASVTRFRLDVNALT  
 451 FIAVIATVCMEDYTEAATIVFLFSVADWLESSAAHKASTVMSSMLSLAPRKAVIAETGLEVDVDEVVINTIVSVK  
 452 AGESIPIDGVVVDGSCDVDEKTLTGESFPVSKQRDSTVLAATINLNGYIKVKTALARDCVVAKMTKLVEEAQKS  
 453 QTKTQRFIDKCSRYTTPAVVVAAACFAVIPVLLKVHNLSHWFHLSLVLVSGCPCGLILSTPVATFCALTKAATS  
 454 GFLIKTGDLSLETAKIKIAAFDKTGTITKAESVSDFRSLSHNINLQNLLYWVSSIENKSSHPMAAALIDYARSI  
 455 SVEPKPNIVENFQNFPGEGVYGRIDGQDIYIGNKRIARAGCLTVSDIEGNMKGKTIYIYVKGELTGSFSLLD  
 456 GCRHGAQALKELKSLGIKTAMLTGDNQDAAMSTQEQLGNALDIVHAELLPQDKARIIDDFKSGQPTMMVGDGLN  
 457 DAPALAKADIGISMGISGSALASETGDIILMSNDIRKIPKGMRLARRSHKKVIENVVLSVSIKGGIMMLGFAGYP  
 458 LIWAAVLADAGTCLLVILNSMMLLRDEREVVSACYRASPPSPVKKLEKVEADDLEVGLLQKSGETSCKKSCRSGC  
 459 CNGSKENQQK  
 460 >EphMA4  
 461 MASDKNKEEEKTKKKKQKSYFDVLGICCTSEVPMIENILKSLDGVKEYSVIVPTRTVIVVHDSLLISPSQIACA  
 462 LNQARLEANVRVDGKTNFKNKWSPFAVVGILLLSFLKFIYSPLRWIAVAVAAGIYPIILAKAVGSRRLRVD  
 463 INILITITVAVTLAMQDFMEAAAVVFLFTIAEWLETRASYKASAVMQSLMSLAPQKAVIAETGEEVEVDEKVNNT  
 464 IVAVKAGETIPIIDGTVVVDGNCEVDEKTLTGEAFVVPKQSDSTVWAGTINLNGYISVKTALASDCVVAKMAKLVE  
 465 EAQSSKSKSQRLIDKCSQFYTPAIIIVSACIAIVPAIMKVHNLNHWFHLALVVLVSACPCGLILSTPVATFCAL  
 466 KAATSGLLIKADYLDLTLKIKIAAFDKTGTITRGEFVIDFKLSRDISLRSLLYVWSSVESKSSHPMAATIVD  
 467 YAKSVSVEPRTEVEDYQNFPGEGIYGKIDGNDIYIGNKRIARAGCLTVSDIEGNMKGKTIYIYVKGELTLAGV  
 468 FNLSDACRSGVAAMLEKDLGIKTAMLTGDNQDAAMHAQEQLGNALDVVHGELLPEDKSKIIQEFKKEGPTAMV  
 469 GDGVNDAPALATADIGISMGISGSALATETGHIILMSNDIRRIPOAIKLARRARRKVVENVFISITLKVGLLLLA  
 470 FTGHPLIWAAVLADVGTCLLVILNSMMLLRDKTKNKRCYRASTSVLNGKKLEDAEVDLDLEAGLLSNGQCNSG  
 471 CCGDKKKQEKVMMRPSGKTSDDHPSGCCGDKQDNVILKVDSCCGEKSCKPDGYMASLSSCKKSTHVNSDLKMKGG  
 472 SGCCAKKKEKLEIVTKSCCEEKERAENVAIQILGOELIDLEKGLQTKVGETCKSSCCGKKDKAKETASLLSSD  
 473 ETSYLEKDEGNCNSGCCDGERQNVETIVDCNSECCDKNRTVKQSCHEKAGLDMEAGVSCDSKLVSCGDTEGEAG  
 474 EQSDFEKGLQVKNERQCSGCCSDEKQTEEITLASEEETDSDYSSGWCKKTVKQSCHEKTGLDIEAGVSCDLKL  
 475 VCCGNIIEGEEVKEQFDLEMENEGHCKFDCCGDEKQTEITLACEEETDDSDCSLGGCCGNKEEVEQSCHEKALDT  
 476 EAGVSCDRKLVCCGNTTEGEVRTKCDLEKGSQIKNVGQCKSDCCGDEKQTEITLASGCCGNEEVTQICQEKPVSK  
 477 TLCCGTGLKQEGSSILPNVSVSNELEIVKVFRQSCCTSPSGVLVSDLQLKKAIAICQVKTPEACGSKCREREK  
 478 RHIGKSCCRSYAKEYCSHRLHHHHHHHHHHHVGA  
 479 >FvHMA1  
 480 MSQLPVTVGNPREPTDHWKLSHNASRFKSPTPPPILLPLNFPSIMETLKFPISIRLPIHHSPLHHHPTAATAA  
 481 RLNSPKPTLHRLRAPLFRFKPSLLSPPRNFPTLRCSAADHSDHHHHDHDDHHHHHHHHHHGGDCAELTGAQK  
 482 AFIGFAKAVRWTDLADFLREHLHLFCFSAALFLAAAACPYVAPKLAAKTVQNAFMIVAFPLVGISAAALDAITDIS  
 483 GGVNIHVLMAAFAFVFMGNALEGLLLAMFNLAHIAEYFTSRSMIDVKELKENYPDSALVLDMDDEQVPDT  
 484 SNLKVKQVPVHDLQVGSYILVGAGESVPVDCEVFQGSATITMEHLTGEVTPLETKAGDRIPGGARNLDGRMIVKA  
 485 RKIWKESTLSRIVQLTEEAQLNKPKLQRWLDQFGERYSKVVVVLSVAVALLGPFLLKWPFIPTAACRGSVYRALA  
 486 LMVAASPCALAAAPLAYATAVSSCARKGILLKGGHVLDALASCHTIAFDKTGTLTTGGLAFKAIEPIYGHQVRDN  
 487 KSDFSSCCVPSCEKEALAVAAAMEKGTTHPIGRAVVDHSEGEDLPSVSVESFEYFPGRGLVATVNGNELGTEGGK  
 488 LLKASLGSVDFITSLCISEDASKKIKEAVDASSYGTDFVRAALSVNEKVTLIHLEDRPRPGVLDVIAELRDQAKL  
 489 RIMMLTGDHESSAWRVANAVGINEVYCSLKPEDKLSHVKGVSRRDMMGGGLIMVGEINDAPALAAATVGIVLAQRA  
 490 SATATAVADVLLLRDNISGVPFCIAKSRQTTSLVKQNVVLAALSCIVLASLPSVLGFLPLWLTVLLHEGGTLLVCL  
 491 NSIRALNHPSWSWRQDLWDLFNQLKSRLEFSRRLATSSNPTQAAPPVSL  
 492 >FvHMA-A  
 493 MAEQAAKQLKSYFDVLGLCCSSEVPLVENILKPLLGVKEVSVVAVATRTVIVVHDSLLISQLQIVKALNQARLEA  
 494 NVRVYGAENSFQKQWSPYAIASGVFLLLSLLKVFYRPMGWLALGAVAVGIFPIAMKGIASIRNLRDLINILMIV  
 495 AVIGTIALNDYLEAGTIVFLFTIAEWLESRAGHKAKAVMSSMLSMAPQKAVLADTGEVVDVDEVKLNLTLLAVKAG  
 496 EVIPIDGIVVDGKGEVDEKTLTGESYPVTKKEDSTVWAGTVNLNGYLSVKTALAEEDCVVAKMKSLLVEEAQNSKS  
 497 RTERFIDKCTKFYTPAVLVISISIAVIPAALRVHNSKWFHLALVVLVSACPCALILSTPVVTFCTLTKAATSGI  
 498 LIKGGDFIETLAKVKIMAFDKTGTITRGEFVVMDFKSLRDDISLNALIYVWSSIERKASHPMAAALVDYGRSFSI  
 499 EPNPENVENFENFPGEGVHGKIDGQDIYIGSKRIALRASCETVPTIEGSKGGKTIYIYCGRTPAGVFTLSDACR

500 TGAAEAVRELKKLGIKTAMLTGDSHAAAMQANEQLEQALDVVHAEELLPEDKAKI IKELKVEGKTAMVGDGINDAP  
 501 ALATADIGISMGISGSALAQDTGNIILMSNDVRKLPKAIQLARRAKRKVIENVILSISTKAGILALAFAGHPLVW  
 502 AAVLADVGTCLLVILNSMLLLRGAHRHGDKHVHNGKHIHSHSHGNQKCCSDHKVVEVCKSQKCSSQRCASECRP  
 503 SSNLSLPGNSTCSSDLHEAKHHDHGSCRSRNRGGNRQSHHTNQHCFSDSKTVVVHEPPKCSSQSCGPDCQPSP  
 504 KASLADDCKCEDSEEIHCSPRNDLHEAKNCDKHDLESQINHKHGCLQOTENLSSCEDHGCTALTVRHGSCGEGYG  
 505 IQSIHEKKDCNHSAPSLEENRRPKSVVDHCHSTHCDKEHISNEAFQETASTSCEEHHHHHHQHQHQDQHHHHHH  
 506 HNNHHHHQHQTSPPHMTIDI IQSSNHTKSALPHACNSGRIREKEVCCPQSMGINACMLEKREVGCCCKSYMKECC  
 507 GVHGHIGSSFQGSLEVTIE  
 508 **>FvHMA-B**  
 509 MFTVQVFGADDQOEEESTKSATKLQKSYFDVLGLCCSSEVALVENILKPLNGVKEVSVILPTKTVIVVHDSHLIS  
 510 QIQIDEAMNQASLESSVKVHVENYKKKWSPYAIASGVLLLLSLLKYVYSPFQWLALGAVAAGIFPILMKCVASI  
 511 RNLKIDINILVIAVIGTIAMSDYVEAGTIVFLFTIAEWLESRSRHKANAVMSSLMSMAPQKAVLAATGDVVDVD  
 512 MVELNTILAVKAGEVIPIDGIVVDGEAEVDEKTLTGESYPVAKLQGSTVWAGTVNLNGYISVKTTALAEDCVVAE  
 513 MAKLVEEAQNRSKTRQRFVDFKAFYTPAVLFSVSVAVI PAALHVPNWSQWFHLALVVLVSACPCALILSTPVV  
 514 TFCTLTNAATSGLLIKGGDYLEILGKIKTMCDFDKTGTITSGEFFVMDFHSLRKDISLNTLLYVVASIERKSSHPM  
 515 ADALVDCARFHSIEPKPENVEDFQSFPGQIRGRIDQDIYIGNRKIALRTASGTVPTIEESGNNGGKTIGYIYCG  
 516 GTPAGIFALSDACRLGAAEAVRELKEIGIKTALLTGDSHTAAIHTNEQLEQAFEVYVYAEELLPEEKARIVNEFKIE  
 517 GYTAMVGDGINDAPALATADIGISMGISGSALAQETGNVILMSNDIRNLPKAI RLAKRANRKVIENVTLMSAPKL  
 518 AVLALAFAGHPLVWAAVLADAGTCVLVILNSMLLLQASNNKQTKGNSEQPDALNTVSNKHSLLPCMNQCCSDST  
 519 NSSTREVCPEKCCSDSEAQVCKPQKCCSDRCGTECLPGPSSPGYMPRNDECMNSVDVDCDSASCKSIGSEVSS  
 520 LTLPLLDHYP  
 521 **>GmHMA1-1**  
 522 MEAIPYSIPSTKLHSSLHIYTGVTIRISLPLRPPPISIKPLYSPNFLILHRHRLRCVAESSNNHHHHHDHDDHHGH  
 523 HHHHHHHHHSHGANLTGPQKAVIAFAKATRWMDLADILREHLHLCCFSTALFVAAAICPHTLPKPLVKPLQNSLI  
 524 FVAFPLVGVASLDALIEISSGKVNIVHLMAMAFAFASIFMGNSLEGGLLAMFNLAHIAEYFTSRSMVDVRELK  
 525 ENNPDFALVLDNTDDDKLPNTFDLAYKRVPHDVTVGSFILVGTGESVPVDCEVFQGSATITIEHLTGEVKPLEA  
 526 KVGDRIPGGSRNLDGRIIVEVMKTWKESTLSRIVQLTEEAQSNPKPKLERWLDEFGERYSQVVVLSIAIAVIGPF  
 527 LFKWPFVSTSACRGSYRALGLMVAASPCALAVAPLAYAIAISSCARKGILLKGGHVLDALASCHTIAFDKTGTL  
 528 TTGGLVFKAIPIYGHVRRNNSNVPSCCIPTEKEALAVASAMEKGTTHPIGRAVVDHSEKDLPSVSVESFEY  
 529 FPGRLTATVNSIESGTGGAKLLKASLGSIDFITSLQSEDESEKIKEAVNTSSYGSEYVHAALSVNQKVTLIHL  
 530 EDRPRPGVNVNVIQELQDEAKLRVMMLTGDHESARRVASVGINEFHCNLKPEDKLSHVKDISRDMGGGLIMVGE  
 531 GINDAPALAAATVGI VLAHRASATAIAVADVLLLRNISAVPFCIAKSRQTTSLVKQNVALALTSILMASLPSVL  
 532 GFLPLWLTVLLHEGGTLLVCLNSVRALNEPSWSWKHDIFHLISEIKSRLLSLKTNITGSNSIITTNL  
 533 **>GmHMA1-2**  
 534 MEAISYSIPSTKLHSSLHIYTGVTIRISSNLLRPPPISIKPLYSPNFLILHRHRLRCVAESSNNHHHHHHHDH  
 535 HGNNHHHHHHHHSHGIHGADLTGPQKAVIAFAKATRWMDLADILREHLHLCCFSTALFVAAAICPHTLPKPLIK  
 536 PLQNSLIFVAFPLVGVASLDALLEISSGKVNIVHLMAMAFAFASIFMGNSLEGGLLAMFNLAHIAEYFTSRSM  
 537 VDVRELKENNPDFALVLDNTDDDKLPNTFDLAYKRVPHDVTVGSYILVGAGESVPVDCEVFQGSATITTEHLTGE  
 538 VKPLEAKVGDRI PGGARNLDGRIIVEVTKTWKESTLSRIVQLTEEAQSNPKPKLQRWLDEFGERYSKVVVVLSIAI  
 539 AVIGPFLFKWPFISTACRGSYRALGLMVAASPCALAVAPLAYAIAISSCARKGILLKGGHVLDALATCHTVAFA  
 540 DKTGTLTTGGLVFKAIPIYGHVRRNNSNVPSCCIPTEKEALAVAAAMEKGTTHPIGRAVVDHSEKDLPSIS  
 541 VESFEYFPGRLTATVNSIESGTGGAKLLKASLGSIDFITSFCQSEVESEKIKEAVNTSSYGSEYVHAALSVNQK  
 542 VTLIHLEDRPRPGVSNVIQELQDEAKFRVMMLTGDHESARRVASAVGINEFHCNLKPEDKLSHVKDISRDMGGG  
 543 LIMVGEINDAPALAAATVGI VLAHRASATAIAVADVLLLRNISAVPFCIAKSRQTTSLVKQNVALALTSIVMA  
 544 SLPSVLGFLPLWLTVLLHEGGTLLVCLNSVRALNEPSWSWKHDISHLISEIKSRLLSLKTNITGSNSIMTANL  
 545 **>GmHMA-A**  
 546 MVENIKRSSFEVLGMCATEEALVERILKPLRGVKDVSIVPRTVTVVHDVLLISESQIADALNAARLEASLRL  
 547 QGETDNEKKWPDLTMMVCGLLLALSFLKYAYOPLGWLALGSVVI GFKVLLRAIASIKALTLNINILVLLAVCGT  
 548 AALQDFWEAGIIFLFSIAQWLETRATHKAMVAMSSLTSMAPQKAVIAETGELVDVNDVKINTILAVKAGDAIPL  
 549 DGIVVEGKCEVDEKMLTGESLPVTKELDSVVWAGTINVNGYISVKTTVLAKDTVVARMSKLVVEASSRKSRTQRF  
 550 IDHFAKYYIPAVVLISASIAVPAALKVPNIKPFH LAIVVLLSACPCALILSTPVAIFCALTKAAISGLLLKGG  
 551 DYIETLSGIKTVAFDKTGTITRGEFTVTDVSVSVDISETLLYVWSSVESKSSHPIAAALVEYGMNLSVKPIPE  
 552 NVENFQNFPGEGVYGIINGKDIYIGNRRIGARAGSERVDCRTQCQSPEISTPNQCCGPTLVGVFRLADTCRSGAL  
 553 EAIEELKLLGVRVSVMLTGDSSQAAMYAQSOLNHALDIVHAEELLPAEKAVI IENFKKDG LIAMIGDMNDAPALAT  
 554 ADIGISMGISGSALANETGNAILMSNDIRKIP EAIRLARDKTTARLKIENVIISIGFKSVILALAIAGYPIVWLAVL  
 555 TDVGTCLLVILNSMLILQEKTKYERKSTSSKYGTFSERMTTALLDKKSNENKAVLSAEKCGKDCCKNDTYREA  
 556 TTNKNESGLSKLSSLKGNHNGNLVSEVHIVKPCNGCGLGKVKMCEDFSCRTNNSSSDCCQEJQSKTEKSDTGS I  
 557 VTQEASIAATLES DGYGKGSMDISKLSGTSVTPKCKNLCCNDSVNNISNLSLSQPEIVIE  
 558 **>GmHMA-B**  
 559 MDKAEKAVQKSYFDVLGLCCSSEVPLIENILKPLEGIKEVSVIVPSRTVIVVHDTLVISQLQIVKALNQARLEAN  
 560 IRVYGDEKHQKRWSPYSIASGVLLLLSLLKVFHPLKYLALGAVAVGAYPIILKAI VSRNLRDINILMLIAV  
 561 IGTIVMNDYLEAGTIVFLFSIAEWLESRASHKANAVMSSLMNITPQKAVIAETGEVVDADEVKIDTVLAVKAGEV  
 562 IPIDGVVLDGTCEVDEKTLTGESFPVAKQKDVSTVWAGTINLNGYISVKTTALAEDCVVAKMAKLVEEAQNSKTSI

563 QRLIDKFAKFYTPGVVIIISALVAVIPLALKQHNEKHWHLFALVVVLSACPCALILSTPVATFCAYSKAATSGLLI  
564 KGGDHLETLAKIKVMAFDKGTITKGEFVVTHFQSLSDIDLNTLAYWVSSIESKSSHPLAAAIVDYGRSLSVEP  
565 EPEKVTEFENFPPEGICGKIEGRVIYIGNKKIATRAGSETVPILOQEIERGKTTGYIYLGATPLGFFSLSDTCRL  
566 GVQEAIGQLKSLGIKTAMLTGDSQSAAMQAQEQLGHSLELVHAELLPEDKVKIISEFKKEGPTAMIGDGLNDAPA  
567 LAAADIGISMGISGSALASETGNIILMSNDIRKIPEAIKLARKARRKVENIVLSIMTKAAIILGLAIGGHPLVWA  
568 AVVADVGTCLLVIFNSMLLLRKGNHGGKCCRSSTKPHNHKNGCGGSHGSSSHHHHHHEHDQQHQHEHSHKHCC  
569 SDKTKKMSQPQKCGGAHGSSSHHHHHHQHEQHNDQHDQHEHNNHDQLDQREHHGHSQHDQHHQKASQTCSSST  
570 CPPCSSNSFFGGIVNHCNTMKAHDQCKGSEDEFHEHDHCHHGRCCKNHDEVHKHDTEDNHAVAIEKRHGSLGHKNH  
571 GTKHCHNQNLDKVTHDSASHSSPCHLNLPCCKESQOFTHNHCHLIHGCENLKDHEKDVLRNSNDIQHEKSGCHS  
572 DFEKHETGEISIDIITEYVELASSLEEKKGKSCREDCSDTCGNLAAVCGCESSNEREDIACCRNEDSSKECKESP  
573 IMHVCDGLNKREVGCCSYMKECCAKLGHSSRPRFVGLSEIITE  
574 >GmHMA-C  
575 MDKAEKAMRKSDFVLDGLCCSSEVPLIENILRPLQGIKEVSVIVPSRTVIVVHDTLVISQLQIVKALNEARLEAN  
576 IRVYGDEKHQKRWSPYSIASGVLLLLSLLKVFVHPLKYLALGAVAVAVYPLILKAIIVSIRNLRDINILMLIAV  
577 IGTISMNHYLEAGTIVFLFSIAQWLESRASHKVMSSLMNIAPQKAVIAETGEVVDADAEVKINTVLEVKAGEVPIPI  
578 DGVVIDGICEVDEKKTGESFPVAKQKDSTVWAGTINLNGYISVKTALAEDCVMAKMAKLVEEAQNSKTNIQRL  
579 IDKFAQFYTPGVVIIISALVAVIPLALKQHNHKLWLQFSLVVVLSACPCALILSTPVATFCAYTKAATSGLLIKGG  
580 DHLETLAKIKVMAFDKGTITKGEFVVTHFQSLSDIDLNTLAYWVSSIESKSSHPSAAAIVDYGRSLSVEPEPE  
581 KVTETFEIIPGEGICGKIEGRVIYIGNKRIAARAGFTVVPILQGEVERGKTTGYIYLGAIPIGFFSLSDACRLRV  
582 QEAIGQLKSLGIKTAMLTGDNQSAAMQVQDELGHSLVHAELLPEDKVKIISEFKKEGPTAMVGDGLNDAPALA  
583 AADIGISMGISGSALASETGNIILMSNDIMKIPEAIKLARKASRKVVENIVFSIMTKAAIILDLAIGGHPLVWAAV  
584 VADVGTCLLVIFNSMLLLRKGNHGGKCCRSSTKPHNHKNGCGGSHDNSSHHHHHEHDQQHQHEDHSHKRCCSEK  
585 TKKLFPPQKCGGAHGSSSHHHHHHRHQHEYHNDQHDQHHQKASQTSFSTCPPCS  
586 >GmHMA-D  
587 ALVAMSSLTSMTPQKAVIAETGERVDVNDVKINTILAVKAGDAIPLDGIVVEGKCEVDEKMLTGESLPVIKELDS  
588 VLWAGTIN  
589 CKNYCVGKRHMVARMSKHVEEASSRKSQTQRFIDNFAQ  
590 KVHDIKPWFHLVIVVLLIACPCALILSTPIAIFCALTCAAISGLLLKGGDYIETLSGIKTVAFDKGTITRGEFT  
591 VTDFSVVDDISIKTLLYWVSSIQSKSSHPMAAALVEYGMSSNIKPIPKNVENFENLPGEGVLGTIDGKDICIGNR  
592 RIGTRDGSKRDD  
593 KQYCGPTLAGVFLVDTCRAGALEAIEELKLLGVRVSVMLTGDRSQDAMYVQSQLNHALDIVHAELHLQKAVI IEN  
594 FKKDGLIAMIGDGINAPALVKKALSLS  
595 SRSMDISK\*YETSVIPNYCKNPCCNHSVNNIGNLSLSQTKIIE  
596 >HiHMA4  
597 RLEANVKVDGKTNFRNKWSPFALVCGILLLSFFKFVYLPLRWIAVAVAAGIYPIILAKAVASTLACRVDINIL  
598 VIITVAATLAMQDYMEAAAVVFLFTIAEWLETRASYSKATAVMQSLMSLAPQKAI I AETGEEVEVDEKVNIVAV  
599 KAGETIPIDGIVVDGNCEVDEKTLTGEAYPVPKQORDSTVWAGTINLNGYVSVKTTSLASDCVAKMAKLVEEAQS  
600 SKTKSQRLIDKCSKYTTPAIIIVSSGFAIVPAVMRVHNLNHWFHLLALVVVLSACPCGLILSTP  
601 >HvHMA1-1  
602 MQFLTTSAAACSSAPPLPRPAHLLRVSRRPPPHLRRRRAPHPSPVSLSLAPKPSLLAASRRSLLFTPRAHGDHH  
603 HHHHHHHHGHGHGHGHGHGGDDGVEVRGGGGGAAMRMARTIGWADVADALREHLQLCCISLGLLLTAAVCPHPV  
604 LLNSVGRPLPAALIAIAFPLVGVSAALDALVDIADGKINIHVLMALAAAFASIFMGNLSLEGGLLAMFNLAHIAEY  
605 FTSKSMYDRELKENDHEPEFALLLETSGDESAHFVSNLYAKVPVHDLEVGSILVRAGEAVPVDGEVYQGSSTITI  
606 EHLTGETKPLERTVGDPAIPGGARNLEGMIVQVTKSWEDSTLNRIVQLTEEGQLNPKLQRLDEFGEHYSKVVV  
607 ALSLAVALLGPFLLFKWPFPGNSVCRGSIYRGLGMLVAASPCALAAVAPLAYATAISSLSKGLLLKGGHVLDAISS  
608 CQSIADFDTGTLTTGKLMCKAIEPIHGHLVDASNGVDPSCCTPNCESEALAVAAAAMEKGTTHPIGRAVLKHSVGRD  
609 LPVVAVESFESLPGRGVATLSGIKARDNESEFAKASIGSVEYISSLYRSYGESEQIKEAVKCSAFGPEFVQAAL  
610 SVDKKTTLFHFDEDEPTGVCEVIYTLREKAKLRIMMLTGDHESQAORVAKAVCIEEVHFSLKPEDKLNKVKAVSR  
611 EGGGGLIMVGDGINAPALAAATVGVILAQRASATAVAVADVLLQDNLCVVPFCIAKARQTTSLVKQSVALLT  
612 CIVFAALPSVLGFLPLWLTVLLHEGGTLLVCLNSIRALNPPTWSWADDIRQLVHSLKNYVSAKLNSSSSDCSAST  
613 VPL  
614 >HvHMA1-2  
615 MPTFPFAGCSATPRGMQFRAASAASSAAPRLQPSARLLRLWRPRPFAHHLPSKPLPVASVPPVLLPRARRSLAFT  
616 PRAHNSHHGHGHGHGHGHGGQCHCHGVMNHGGGGGATVMRLAKAIGWADIADALRDHLQVCCISLGLLLIAACPHVA  
617 PLNSVGRLOVALIAVAFPLVGVSAALDALVDIADGKINIHVLMALAAAFASVFMGNLSLEGGLLAMFSLAHTAEY  
618 FTRKSMVDVRELKENDHEPEFALLLETSGDSTRFSNLSHTKVPVHDLKVGSHILVRAGEAVPVDGEVYQGSSTVTI  
619 EHLTGETKPLERTVGDPAIPGGARNLEGMIVQVTKSWEDSTLNRIVQLTEAGKINKPKLQRLDEFGEHYSRAVV  
620 VLSLLVALLGPLLFKWPFPGNSVCRGSIYRALGMLVAASPCALAAVAPLAYATAISSLTRKGLLLKGGHVLDAISSA  
621 CQSIADFDTGTLTTGKLMCKAIEPIHGHLVDNRNLNDSSCCTPSCSEALAVAAAAMEKGTTHPIGRAVLDHYVVK  
622 DKDLPEVVLQSFECPLPGRGVFATLSITKMTLHFHFEDEPRAGACEVISTLRDKAKLRIMMLTGDHESALRVAKAV  
623 CIDEVHCCCLKPEDKLNKVKAVSSRGGSLIMVGDGINAPALAAATVGVVLAQRASATAVAAADVLLQDNICGVP  
624 FCIKARQTTSLVKQSVGLALSCILLAALSSVLGFLPLWLTVLVHEGGTLLVCLNSIRALNAPTWSLADEIRQLV  
625 DVLRKYISAKLNSSNCAHTVPL

626 >HvHMA2  
627 MAAPAPAAAGKLEKSYFDVLGICCPSEVPLVEKLLLEPLAGVHKVTVVVPSRTVIVLHDAAAI SQAQIVRALNGAR  
628 LEASVRAYGGAGQSKVTNKWPSPIVVLVCGVLLVVSLEFHFWRPLKWFVAVAGAAA GLPPI IILRSVAALRRRTMDVN  
629 ILMIAVAGAI ALKDYSEAGFIVFLFTIAEWLETRACGKATAGMSSLSMAPQNAVLAETGQVVATQDVKINTVI  
630 AVKAGEIVPIDGVVVDGRSEVDESTLTGESFPVSKQADSQVWAGTLNIDGYIAVRTTAMADNSAVAKMARLVEEA  
631 QNNRSSTQRLIDTCAKYTTPAVIFMSAAVAVIPVCLKARNLKHWFELALVLLVSACPCALVLTSPVATFCALLRA  
632 ARTGLLIKGGDVLES LASIKVAADFDTGTITRGEFSVEEFQTVGERVSKQQLLYWVSSIESRSSHMAALVGYA  
633 QSNSVEPKSENVAEFQMPGEGIYGEI GEGEVYVGNKRILARASCQIVPDIVEHMKGVITIGYVACNKELIGVFSL  
634 SDSCRTGSAEAIKELRSLGIKSVMLTGDSTAAATHAQNQLGNILAEVHAELLPEDKVRIVDELKARDGPTLMIGD  
635 GMNDAPALAKADVGSMGVS SAVAMETSHITLMSNDIRRI PKAIKLARRTHRTIVVNI VFSVTTKLAI VALAFA  
636 GHPLIWA AVLADVGTCLLVIMYSMLLLREKSGSKVAKKCCASSHSHKKGHRTHHCSDGHHHENVSTGGCVDSSA  
637 GKHSCHDHHHEHDHHEKPSNLHSDVKHGCHDHGHVHSHCKEPSSQMVTSKDV AHGHGHTHNICNPHPAANKHDCH  
638 DHEHSHHQEPNSSHSADEHDCGHGKHCEEPTSLLCATEHACHDHDQNEHHCCDEEKT VHVADTHSCHDHKHEQG  
639 AADSVPELSIWI EGQSPDHREQEIQ CSTEHKEEACGHHLKVKDQVPAKTDCSRGGCHGTASSKTCESKGNVCS  
640 WPGVRTGVVRRCCRTRTHSCCSQSM LKLP EII VG

641 >HvHMA3  
642 MTGSGESYPAL EASLLSDEAAA SARRKWEKTYLDVLGVCCSAEVALVERLLAPLDGVRVAVSVVVPSRTV VVEHDP  
643 SAVSQSRIVKVLNGAGLEASVRAYGSSGVI GRWVSPYIVACALLASSFRWLLPPLQWLALGAACAGAPPMVLR  
644 GFAAASRLALDINILMLIAVVGAVALKDYTEAGVIVFLFTTAEWLETLACTKASAGMSSLSMIPPKAVLAETGE  
645 VVNVRDIDVGAVIAVRAGEMVPVDGVVVDGQSEVDERSLTGESYVPVKQPLSEVWAGTLNLDGYIAVRTSALAEN  
646 STVAKMERLVEEAQ QSKSKTQRLIDSCAKY TPAVVF LAGAVALLPPLV GARD AERWFR LALVLLVSACPCALV  
647 STPVATFCALLTAARMGLLVKGGDVLES LG EIKAVAFDKTGTITRGEFTVDIFDVVGHKVQMSQLLYWISSIESK  
648 SSHPMAALVEYAQSKSIEPKPECVAEFRILPGEIYGEIDGKRIYVGNKRVLARASSQTAVPERMNGLKGVSI  
649 GYVICDGLVGVFSLSDCRTGAAEAI RELASMGISSVLLTGDSAEAAVHAQERLGGALEELHSELFPEDKVRIV  
650 SAVKARVGPTMMVGDGMNDAPALAMADVGVSMGISGSAAMETSHATLMSDILRVPEAVRLGRRARRTIAVNMV  
651 SSVAAKVAVLALALAWRPVLWAAVLADVGTCLLVVILNSMLLLGEGGGRRGKEEACRATARSLEMRRS QLA AVSPD  
652 AATKSVGKTGGDASKGCHCHKPIK SPEHSVVINVRVDEQREGPTDATCTPAKNVEVTGLVDASVMPASSSCVSG  
653 GGCCSREKTGRNM

654 >JcHMA-A  
655 LKAIASIRNFRDLTNI LVLIAVIGTVALKDYAEAGTIVFLFTIAEWLES RAGHKANAVMSSLMNIAPQKAVIAET  
656 GEEVDVDEVKLN TIVAVKAGEIIPIDGVVVDGNSEVDEKTLTGESFPV PKLKDSTVWAGTINLNGYVNVKTTALA  
657 EDCVVAKMAKLVEEAQNSKSTTQRFIDKIAQYYT PAVIIISASLAGVPLAFRVDNLKHWLHLALVVLVSACPCAL  
658 ILSTPVATFCALTKAATSGVLIKGGDYLETLSKIKVAFDKTGTITRGEFVVVEFQSLCQDISIDTLLYWVSCIE  
659 SKSSHMAALVDYGRSL SVEPRPENVEEFQNFPGEGIHGKIDGKEIYIGNRKM GIRAGCERIPLVEMDTKSGKT  
660 IGYVYSGATPAGV FSLSDACRTGVAEAI AELKSLRIKTAMLTGDGQAAAMHAQQQLGNALEIVHAELLPEDKARI  
661 IEAFKKEGKTAMIGDGLNDAPALATADIGISMGISG SALATETAHVILMSNDIRKVPKAIQLAKKAHKT VIONVI  
662 LSISTKSAILALAFAGHPLIWA AVLADVGTCLLVILNSMLLLRETHKKHRGKCCNSKSAEKIKKCDSHHSHHHK  
663 QCCEQNVERACTTHKSQRGKCKSTSAEKIKKCD SNIKRCCKKVEKQCRPSCASKCEPNANNKCTDSAE LKHCN  
664 HVSLESKNQ QKHSCSGLSTREKCTNSVQKEGK CNEGEHSPPSHCISNHSNHSTDMEPITLKN SKNGHCHDHCG  
665 KDHANIHVEVDSLENI VDSGFTTPRPNQ QKPNYCSTSQMAAVHVCMSLEKREMGCCCKSYMKECCDKHGQFASGL  
666 GGSLS EIIIE

667 >LsHMA-A  
668 KCEVDEKTLTGESFPVVKQVDSIVYAGTLNNGYISVKTTALADDCVVAKMGLVEEAQNNKSKTQRYIDEIAKY  
669 YTPAVVVAA SLAAI PAAMRVRDVEKWHLALVVLVSACPCALILSTPIA AFCALS KAATSGLLVKGAEYLEILS  
670 TVKVICFDKTGTITKGEFSVSSFKPLIHNDKLLYWVSSIESKSSHMAATLV DYAQSHSVQPPDNVEEFKDF

671 >LsHMA-B  
672 TLNNGYISVKTTALAEACVVAKMAKLVEEAQNNKSKTQRYVDECAKY TPGVCVVAACLAGIPAA MRVHDM EKW  
673 YHLALVVLVSACPCALILSTPVA AFCALS KAATSGLLVKGAEYLEILSTV KVICFDKTGTITKGEFSVSSFHPLI  
674 DNQKLLYWVSSIESKSSHMA

675 >MtHMA-A  
676 MVENIKRSNFEVLGMCATEATLVERILKPLHGKAVSVI VPARTVTVVHDVLLISESKIADALNTARLEASFRP  
677 QGETNNEKKCPDILTMACGLLLALSFLKYIYPPLGWLALGVAIGFPKVLFRAIASIRALTLNINILVLLAVCGT  
678 AALQDFTDGGV IIFLFSIAQWLETRATHKALVAMSSLTNMAPQMAI VAETGERVDVNDVKMNTILAVKAGDAIPL  
679 DGIVVEGKCEVDEKMLTGESFPVTKESDSLWAGTINMNGYISVRTTVLAKDTVV ARMSRLVEEASSRKS LAQRF  
680 IDNFAYKIYIPVVVLSIASI AVVPAALSVPDMEPWFHLALVLLVSGPCALILSTPVAIFCALTKAAISGLLLKGG  
681 DYLETLSRIKTVAFDKTGTITRGEFSVDF SAGDDINNETLLYWISSIESKSSH PVAGALVDYARLHSIKVPEN  
682 VENFQNFPGEGIFGTIDGRDIYIGNKRVGVRAICKRDNCEVQFORPEISTKKNCEETLVGVFSLVDACRS GALE  
683 AMEELKLLGVRVMLTGDSSQVAMYVQSOLKNAIDIVHAELLPEHAKLIENFKKEGPIAMIGDGINDAPALATA  
684 DIGISMGISG SALANETSNAILMSNDIRKVP EAIRLARKTTRKLVENVIISVGFKCAI LALAIAGYPLVWLAVLT  
685 DVGTCCLLVILNSMLILQENH KYEKRESTKGSKYGKFLEDKTKPLLNQSNIDE EKGLLSGEECGKDCKNATHYV  
686 ETSKERNDESCGVSKLSLLNGNDHGMFMFVEVHVVKHCVMIQDSSILTLESQ GKDKSITVSETSGISECCKNR  
687 CNDI

688 >MtHMA-B

689 MSSSEGGKKLQKSYFDVVGLCCSSEVPLIENILKPLQGVKEVSVIVPSRTVIVVHDTLLISQLQIVKALNQARLE  
690 ANIRIYGNENHKKKWPISIYSVASGLLLLLSFLKFVYTPFKYVALAAVVAGIYPIFLKAIVSIRNLRIDINILVII  
691 AVAGTIAMNDYLEAGTIVFLFSISDWLESSASHKSNVMTSLMSIAPQKAVIAETGEDVDVDEVVNTILAVKAG  
692 EIIIPIDGIIVDGDCEVDEKTLTGESFPVAKQKDVSTVWAGTINLNGYISVKTTALAEDCVVAKMTKLVEDAQNSKT  
693 STQRLIDKFAKFYTPAVIFISTLVAVVPVVLKVHNEKYWLHFALVVLVSACPCALILSTPVATFCAYTKAATSGL  
694 LIKGGHALETAKIKVMAFDKGTITKGEFAVTNFQSLSDIDLNTLIYWVSCIESKSSHPLAEAVDHRGRSLSI  
695 VPNEKVFTEFENFPPEGICGKIDERVLYIGNKKIATRAGSETVVVPTLEGEAHGGKTIYIYSGPTPVGIFSLSDT  
696 CRSGVQEAIRKLLKLLGIKTAMLTGDCQSAAMQAQEQQLGHAELELVHAELLPEGKVKIITEFKKDGPTAMLGDGLND  
697 APALASADIGISMGISGSALASETGDIILMSNDRKRIPEAIKLARKARRKVIENIVLSVITKVAAILALAIAGHP  
698 VWAAVLADVGTCLLVILNSMLLLPRGHKHGGKCKSSNQHHVHKNGCGDTNDGSSHHHHRHHQHQQHSHKRCCS  
699 EKAQPQKCASQSCSSKNPSCSTSNPSLIGNVNPLKNMENHDHCHQGSCKDRDGVQKHNIENKFCSDFDHDLNLNAE  
700 DIGADAVNSHGNCQGHKSHGTHKCHYKNINMDTHDHTSLGSHCHLSPCDKKTQVTKHCHSNHGCENLKDHTI  
701 HDIQHQKSGCHSDFKKHETDEISIDIITEHVELASMHGCSNLAEKEKDSCKDCPKLPVVCGGCEGPNEREVSPCC  
702 KNEGYSKESIESSIMHACISFDKREVGGCKSYMKECCGRHGHSGAGSFVGLSEIVTE

703 >NchMA4

704 MALQKEIKNKEEDKKTKKKWKQKSYFDVLGICCTSEIPLIENILKSLDGVKEYTVIVPSRTVIVVHDSLLISPFQI  
705 AKALNQARLEANVKNGETSFKNKWSPFAVVGIFLLSFLKFVYPPRLWLAVVGAAGIYPIAKAVASIRRL  
706 RVDINILVITVAATLAMQDYMEAAAVVLFITADWLETRTSYKANSVMQSLMSLAPQKAVIAETGEEVEVDEKQ  
707 LNTIIAVKAGETIPIDGIVVDGNCEVDEKTLTGAEAFVVPKQDSTVLAGTMNLNGYISVNTALASDCVVAQMAK  
708 LVEEAQGSKTKSQRLLDKCSQYYTPAIIISAGFAIVPAIMKVHNLNHWFLALVVLVSACPSGLILSTPVATFC  
709 ALTKAATSGLLIKSADYDLTSLKIKIAAFDKGTITRGEFIVIEFKSLSRDISLRSLLYVSSVESKSSHPMAAT  
710 IVDYAKSVSVEPRSEEVEDYQNFPEGEGYIGKIDGNNVYIGNKRIASRAGCSTVPEIEVDTKKGTGTVGYVYGERL  
711 AGVFNLSDACRSGVAQAMKELKDLGIKTAMLTGDNQDSAMQAQEQQLGNALDVVHGELLPEDKSKIQEFKKEGPT  
712 CMVGDGVNDAPALANADIGISMGISGSALTTOTGHIILMSNDRIPQAIKLARRAQRKVLQNVFISITLKVGL  
713 VLAFAGHPLIWAAVLTDVGTCLIVILNSMLLLREKDKSKIKKCYRKKVGGDDQGLDLEAGLLSKSQNSGCCGD  
714 KKSQEKVMLMRPASKTSSDHLHSGCCGKQESVKLVKDSGCCGKSRKPEGDMASLSSCKKSNNDMMKMGSSCC  
715 ASKNEKLKEAVVAKSCCEDKEKTEGNVEMQIPNLEKGSQKQVGETCKSSCCGDKKAKETRLLLASEDPSYLEKE  
716 ERQTEANIVTVKQSCHEKASLDIETGVTCDLKLVCCGNIIEVGEQSDLEKGMKLGEGQCKSDCCGDEIPLASEE  
717 DSVDCSSGCCGNKEELTQICHEKTCLDIVSCDSKLVCCGETEVEVREQCQLKGLQIKNEGQCKSVRCGDEKTE  
718 EITEEDNLKSESGDDCKSLCCGTGLKQEGSSSLVNVVVESEGESSSCCSKEGEIVKVSSQCCASPDRVVLSL  
719 EVKLEICCKAKKTPPEEVRSKCKETEKRRHHVGVKSCCRSYAKEYCSHRHHHHHHHHHVGA

720 >NtHMA-A

721 MVESEKMNETHKLSKSYFDVLGICCTSEVVLVEKVLKNLEGVKEVSVIVTTKTVIVIHDSLLISPOQIVKALNQ  
722 RLEASIRVKGKKNYQKKWSPFAIGSILLGLSFLKYFFAPFQWLALAAVAVGIPPIIFRGVAAVRNLTLDINIL  
723 VLIAVAGSIVLHDYWEAGTIVFLFAIAEWLESRASHKATAAMSSLVNIVPPTAVLAESGEVNVDEVKVNLSILAV  
724 KAGETIPIDGVVVEGEDVDEKTLTGESFPVSKQDSTVWAGTINLNGYISVKTTALAEDCAVARMAQLVEDAQ  
725 KKSKTQRYIDKCAKYYTPAIVAIASASLAIVPTALRVHNRNEWYRLALVTLVSACPCALVLPVAMCCALSKAAT  
726 SGLLFKGAEYLETAKIKIMAFDKGTITKGEFVTEFKSLIDGFSLNTLLYVWSSIESKSGHPMAAALVDYAQS  
727 NSVEPKPDRVEQFQNFPEGEGIFGRIDGMEIYVGNRKISSRAGCTTVPEIEGDSFKGKSVGYIFLGSSPAGIFSL  
728 DVCRIKVKEAMRELKQMGIKTAMLTGDCYAAANHVQDQLGGALDEFQAELLPEDKATIIGKFQKEAPTAMIGDGL  
729 NDAPALATADIGISMGISGSALAKETGHVILMTNDIGRIPKAARLARRVRRKIVENMISVVTKAAIVALAIAGY  
730 PLVWAAVLADTGTCLLVILNSMLLLRGGTRRHGKCCWRSSSTPASHAPTTKTKLHVASRKMPLSCVALILSHKRNQ  
731 VNHARPCVTFQDANRSPQDQSHVEIISAQTPSHKVIIVFIIAVLNARRRRLKXANLQFQONQSAEIIISAQTPK  
732 IIVFILIPVLNARRRRLQKLANLQFQONQSHVEIISAQTPKSNLQSHVATISSAQTPLKSNLQSHVATISSAQTPLK  
733 NNNCSDSIHKSCHSLTNSLVCSSKMSAPQCHSATSSNKSGSTKCSDFSDKCCQSDKIPQTCSTKKSAPGCCQS  
734 AVSGSKSCGNSKSDSKDNSSHPHPDHQTCMSKLCAPQSQSATSSSRTCGNTKCSDTNSKNSCYSQTNSESCSS  
735 KMSGPCKTANSGRSCRNKKQDSATENSFHSPLTNPLSSEKLSLQSLDLVRKDKESHDLRHGCSDEGHHT  
736 NLDKAYDSCALQECYSVQGNKTDVSETGIIQETAHCDSTNQTCTQATASSGSMTCGNDKILDSLSIHGCHSHDNPLH  
737 EENNLEQKILDVVGEGIKSPHAVGHGCSDEKHDHSHPEKAYDSCATDDCCFSVQVHGIDDVSKSEIETAHCDST  
738 QQSMVISSCKHEPKDQVNHCHLHSGTTPTEELAKLVRRCCKYKPCHDVRSGRKHAACGPTVRSTINILRDN  
739 HHHYLDSCGRKVCSLLEKRHIGGCCDSFRKECCAKKKHLGASFGGLSEIVIE

740 >NtHMA-B

741 MVESEKMNETHKLSKSYFDVLGICCTSEVVLVEKILKNLEGVKEVSVIVTTKTVIVIHDSLLISQQQIVKALNQ  
742 RLEASIRVKGKKNYQKKWSPFAIGSILLGLSFLKYFFAPFQWLALAAVAVGIPPIIFRGVAAVRNLTLDINIL  
743 VLIAVTGSIVLHDYWEAGTIVFLFAIAEWLESRASHKATAAMSSLVNIVPPTAVLAESGEVNVDEVKVNLSILAV  
744 KAGETIPIDGVVVEGEDVDEKTLTGESFPVSKQDSTVWAGTINLNGYISVKTTALAEDCAVARMAQLVEDAQ  
745 KKSKTQRYIDKCAKYYTPAIVAIASASLAIVPTALRVHNRNEWYRLALVTLVSACPCALVLPVAMCCALSKAAT  
746 SGLLFKGAEYLETAKIKIMAFDKGTITRGEFVTEFKSLVDGLGLNTLLYVWSSIESKSGHPMAAALVDYAQS  
747 NSVEPKPDRVEQFQNFPEGEGIFGRIDGMEIYVGNRKISSRAGCTTVPEIEGDSFQKSVGYIFLGSSPAGIFGLS  
748 DVCRIKVKEAMRELKQMGIKTAMLTGDCYAAANHVQDQLGGAMDEFQAELLPEDKATIIGKFQKEAPTAMIGDGL  
749 NDAPALATADIGISMGISGSALAKETGHVILMTNDIGRIPKAARLARRVRRKIVENMISVVTKAAIVALAIAGY  
750 PLVWAAVLADTGTCLLVILNSMLLLRVGTHRHGKCCRSATPASHAPNHKDKASCKSENAPQLCCSDIESQKCT  
751 SQSCSSEVCVPRCQPVSSGSKSCGNNQCPDSDVENSFHSHPRLVCSKMSAPQCHSATSSSKSCGSTKCSNFSD

752 KKCCQYDKIPQTCSTKKSAPGCQSAVSGSKSCGDSKCSKSDNSHPSHPDHQICTSKLCAPOQSOSATSSSRTCG  
753 NMKCSDTNSKNNSCYSHNTSESCSSKMSGPACKTANSRGLCGNKKCLDSANENSFHSLTNPLCEEKLEKESLDL  
754 ARKDRESNHDLSHGYSDEEHDHLNLDKAHDSALQECCYSVQGNKTDVSETGIQEAHCDNSINQTCQTAISGSM  
755 CGNNKSLDLSLHGHSHSPLHKEKNLEQKSLDVAGEGKSPHAVGQGCSDKEHNHSHPEKAYDSCATDDCCFS  
756 VQVHGIDDVSRSEIQETAHCDSTKQSTVIPSSCEHEPKDQVNHCGSHSISPTDEELAKLVRRCKYKPCHDVRS  
757 GCRKHAECGPTVRSTINILRDNHHHHLDCSGRKCVCLEKRIHGGCCDSFRKECCAKNHLGASFGGGLSEIVK  
758 GRIPAHWRPLLVDPSVPS  
759 >OgHMA1  
760 MQLLTAASASASSAAASPPSAHLLRSLRPPFPPLRRRCAPHLPSKPLNLAARSPLLLARRSLPFAPRAHGDHHH  
761 GHHHHHHGHGSHHHHGPEVHGSGGGAAMRVAKAIGWADVADALREHLQLCCISLGLLLIAAACPHIPVLSVRR  
762 LQDALIAVAFPLVGVSAALDALVNIADGKINIHVLMALAAAFASIFMGNSLEGGLLLAMFNLAHIAEEHFTSKSMI  
763 DVRELKENHPEFALLLETCGQSAQFANLCYTKVPVHDLEVGSHILVRAGEAVPVDGEVYQGSSTVTIEHLTGET  
764 KPLERTVGDIAIPGGARNLEGMMIVKVTKSWEDSTLNRIVQLTEEGQLNKPKLQRLWDEFGEHYSRVVVVLSLVA  
765 LLGPLLFKWPFNGSVCRGSIYRGLGLMVAASPCALAVAPLAYATAISSLASKGILLKGGHVLDAALSACQSI  
766 AFDKTGTLTTGKLMCKAIEPIHGHSDVTNDFSDQACCTPNCESEALAVAAAMEKGTTHPIGRAVLDHDSVGD  
767 LPLVAVESFECLPGRGVVATLSGVKAGNNEDELSKASIGSVEYISSLYRSSGESEQIKEAVKASAFGPEFVQ  
768 AALTVDKKVTLFHFEDEPRSGVCEVISTLRDKAKLRIMMLTGDHESALRVAKAVCIDEVHCLCLKPEDKLNK  
769 VAVSREGGGGLIMVGDGINDAPALAAATVGVILAQRASATAVAVADVLLQDNICGVPFCAIKARQTTSLVKQ  
770 SVALALSCIVFAALPSVLGFLPLWLTVLLHEGGTLLVCLNSIRALNSPTWSWVDDIRQLINSLRKYISSKLQ  
771 STSSNYVADAVPL  
772 >OgHMA2  
773 MAARGRCQKSYFDVLGICCPSEVPLVEKLLQPLEGVQKVTIVVPSRTVIVVHVDVAISQSQIVKALNQARLEAS  
774 VRAYGNGSEKITNKWSPYVLLCGLLLVVSLEFHFHPLKWFALVAAAAGLPPIVLRSIAAIRRLTLDVNI  
775 LMLI AVAGAIALKDYSEAGFIVFLFTTAEWLETRASHKATAGMSALMSMAPQKAILAETGEVVAARDV  
776 KVNTVIAVKAGEVIPIDGVVVDGRSEVDESTLTGESFPVSKQPSQVWAGTLNIDGYIAVRTTAMADNSAVAK  
777 MARLVEEAQNSRSTQRLIDTCAKYYPVAVVMAGSVAIPAIAKAHNLKHWFLQALVLLVSACPCALVLS  
778 TPIATFCALLRAARTGL LIKGGDVLESASIKVAADFDTGTITRGEFSVEEFQPVGEHVS  
779 LQQLLYWVSSIESRSSHMASVLDYQSKSV EPKSENAEFQIYPGEGIYGEIDGAGIYIGNKRILSRASCET  
780 VPMKDMKGVITIGYVACNNELIGVFTLSDACRT GSAEAIKELRSLGIKSVMLTGDSTAAATYA  
781 QNLGNILAEVHAELLPEDKVRIVGELKEKDGPTLMVGDGMNDAP ALAKADVGVSMGVSGSAVAMET  
782 SHITLMSNDIRRIKAVRLARRTHRTIIVNIFSVITKLAIVGLAFAGHPLIW AAVLADVGTCLLVI  
783 MYSMLLREKDGKAKKCAASHHGSPKCCSSHGHSHAKKNHGISNHCSDBGPKSMVSCKE SSAAKNACH  
784 DHHHEHNHHEEPAHKHSNQHGHCHDHSHGHSNCKEPSNQLITNKHACHDGHNHCDATSNLHDTKKH  
785 QVHEHHCCDEQQTADLHPCHDHDHNDLEVEEVKDCHAEPHHHNCHEPHDQVKNDTHPVQEH  
786 SISIEESSDHHEHHNEEHAEDCGHHPKPKDCAAPPTDCISRNCSSNISKGDICSSLHKDHHTS  
787 QASRCCRSYVKCSRPSRSCSHSIVKLPEIVVE  
788 >OgHMA3  
789 MAGKDEAEGLERLLLLPPEAAAEETRCGGGDDGSGGRKRKKTYLDVLGVCCSAEVALVERLLAPLDGVRVSV  
790 VVASRTVVVEHDPAAAPESAIKALNKAGLEASVRAYGSSGVVSRWPSPIVASGVLLTASFFEWLFPPLQCLAV  
791 AAVVAGAPPMVRRGFAAASRLSLDINVLMLIAVAGALCLGDYTEAGAVFLFTTAEWLET  
792 LACTKASAGMSSLMG MLPVKAVIATTGEVVSVRDVRVGDVVAVRAGEIVPVDGVVVDGQSEV  
793 DERSLTGESFPVQPHSEVWAGTMNLD GYIAVRTTALAENSTVAKMERLVEAAQNSRKTQRLIDSCAKY  
794 YTPAVVVVAAGVALIPALLGADGLEQWKLAL VMLVSACPCALVLS  
795 TPVASFAMLRARMGIFIKGGDVLESLEIRAVAFDKTGTITRGEFSIDSFHLVGDHKVE MDHLLY  
796 WIASIESKSSHPMAALVEYAQSKSIQPNENVGDFRTYPPGEGIYGEIHGKHIYIGNRRTLARASS  
797 PQSTHEMGEIMIKGVSIGYVICDELAVFSLSDDCRTGAAEAIRELGLSGLIKSVMLTGDSSAAATHA  
798 QQLGGMVEEL HSELLPEDKVRVGLKARFGPTMMVGDGMNDAAALAAADVGVSMGISGSAAAMET  
799 SHATLMSDVLRVPEAVRL GRRARRTIAVNVAGSVAVKAAVLALAAAWRPVLA  
800 AVLADVGTCLLVVLSMSTLLREEWKGGAKEDGACRATARS LAMRSQLAADSQAPNAADAGAAGRE  
801 QTNGCRCCPKPSMSPEHSVVIDIRADGERQEERPAEAAVAKCCGGGGGEGIRCGASKKPTATV  
802 VVAKCCGGGGGGEGTRCGASKNPATAAVVAKCCGGGGGEGIGCGASKKPTATAVAKCCGG  
803 GGEGTRCAASKKPTATAVAKCCGGGGGGEGTGCGASKRSPPAEGSCSGGGGTNGVGRCTSVKRP  
804 TCCDMGAAEVSDSSPETAKDCRNGRCCAKTMNSGEVKG  
805 >OsHMA1  
806 MQLLTAASASASSAAASPPSAHLLRSLRPPFPPLRRRCAPHLPSKPLNLAARSPLLLARRSLPFAPRAHGDHHH  
807 GHHHHHHGHGSHHHHGPEVHGSGGGAAMRVAKAIGWADVADALREHLQLCCISLGLLLIAAACPHIPVLSVRR  
808 LQDALIAVAFPLVGVSAALDALVNIADGKINIHVLMALAAAFASIFMGNSLEGGLLLAMFNLAHIAEEHFTSKSMI  
809 DVRELKENHPEFALLLETCGQSAQFANLCYTKVPVHDLEVGSHILVRAGEAVPVDGEVYQGSSTVTIEHLTGET  
810 KPLERTVGDIAIPGGARNLEGMMIVKVTKSWEDSTLNRIVQLTEEGQLNKPKLQRLWDEFGEHYSRVVVVLSLVA  
811 LLGPLLFKWPFNGSVCRGSIYRGLGLMVAASPCALAVAPLAYATAISSLASKGILLKGGHVLDAALSACQSI  
812 AFDKTGTLTTGKLMCKAIEPIHGHSDVTNDFSDQACCTPNCESEALAVAAAMEKGTTHPIGRAVLDHDSVGD  
813 LPLVAVESFECLPGRGVVATLSGVKAGNNEDELSKASIGSVEYISSLYRSSGESEQIKEAVKASAFGPEFVQ  
814 AALTVDKKVTLFHFEDEPRSGVCEVISTLRDKAKLRIMMLTGDHESALRVAKAVCIDEVHCLCLKPEDKLNK  
815 VAVSREGGGGLIMVGDGINDAPALAAATVGVILAQRASATAVAVADVLLQDNICGVPFCAIKARQTTSLVKQ  
816 SVALALSCIVFAALPSVLGFLPLWLTVLLHEGGTLLVCLNSIRALNSPTWSWVDDIRQLINSLRKYISSKLQ  
817 STSSNYVADAVPL  
818 >OsHMA2

815 MAEAGGRCQKSYFDVLGICCPSEVPLVEKLLQPLEGVQKVTIVPSRTVIVVHVDVAISQSQIVKALNQARLEAS  
816 VRAYNGNSEKITNKWSPYVLLCGLLLVVSLEFHFHPLKWFALVAAAAGLPPIVLRSIAAIRRLTLDVNIILMLI  
817 AVAGAIALKDYSEAGFIVFLFTTAEWLETRASHKATAGMSALMSMAPQKAILAETGEVVAARDVKVNTVIAVKAG  
818 EVIPIDGVVVDGRSEVDESTLTGESFPVSKQPDSQVWAGTLNIDGYIAVRTTAMADNSAVAKMARLVEEAQNSRS  
819 STQRLIDTCAKYYPVAVVMAGSVAIPAIAKAHNKHWFLQALVLLVSACPCALVLSTPIATFCALLRAARTGL  
820 LIKGGDVLESASIKVAADFDTGTITRGEFSVEEFQPVGERVSLQQLLYWVSSVESRSSHPMASVLVDYAQSKSV  
821 EPKSENVSEFQIYPGEGIYGEIDGAGIYIGNKRILSRASCETVPDMKDMKGVITIGYVACNNELIGVFTLSDACRT  
822 GSAEAIKELRSLGIKSVMLTGDSSAAATYAQNQLGNILAEVHAELLPEDKVRIVGELKEKDGPTLMVGDGMNDAP  
823 ALAKADVGSMGVSASAVAMETSHVALMSNDIRRIKAVRLARRTHRTIIVNIIFSVITKLAIVGLAFAGHPLIW  
824 AAVLADVGTCLLVIMYSMLLLREKDSRKAKKCAASHHGSPKCCSSSHHGSHAKKNHGVSHHCSGDPCKSMVSCK  
825 ESSVAKNACHDHHHEHNHHEEPAHKHSSNOHGCHDHSHGHSNCKEPSNQLITNKHACHDGHNHCADTSLNLDHTKK  
826 HDCHGHEHSTCKEELNALPPTNDHACHGHEHSHCEEPVALHSTGEHACHEHEHEHIHCDEPIGSHCADKHACHDH  
827 EQVHEHHCCDEQQTPTADLHPCHDHDHNDLEVEEVKDCCHAEPPHHHNCHEPHDQVKNDRHPVQEHSSISIEES  
828 SDHHEHHHNEEHKAEDCGHHPKPKDCAPPPTDCISRNCCSNTSKGKDCSSSLHRDHHTSQASRCCRSYVKCSRPS  
829 RSCSSHSIVKLPEIVVE

830 >OsHMA3

831 MAGKDEAEGLLEARLLLLPPEAAAEPTRCGGGDDGGGGGRKRKKTLYLDVLGVCCSAEVALVERLLAPLDGVRVVS  
832 VVASRTVVVEHDPAAAPESAIVKALNKAGLEASVRAYGSSGVVSRWSPYIVASGVLLTASFFEWLFPPLQCLAV  
833 AAVVAGAPPMVRRGFAAASRLSLDINVLMLIAVAGALCLGDYTEAGAIVFLFTTAEWLETLACTKASAGMSSLMG  
834 MLPVKAVIATTGEVVSVRDVRVGDVVAVRAGEIVPVDGVVVDGQSEVDERSLTGESFPVPKQPHSEVWAGTMNFD  
835 GYIAVRTTALAENSTVAKMERLVEAAQNSRSKTQRLIDSCAKYYTPAVVVVAAGVALIPALLGADGLEQWWKLAL  
836 VMLVSACPCALVLSTPVASF CAMLRAARMGIFIKGGDVLESLEIRAVAFDGTGTITRGEFSIDSFHLVGDHKVE  
837 MDHLLYWIASIESKSSHPMAALVEYAQSKSIQPNPENVDGFR IYPGEGIYGEIHGKHIYIGNRRTLARASSPOS  
838 TQEMGEMIKGVSIGYVICD GELAGVFSLSDDCRTGAAEAIRELGLSLGIKSVMLTGDSSAAATHAQQLGGVMEEL  
839 HSELLPEDKVRVLSGLKARFGPTMMVGDGMNDAAALAAADVGVSMGISGSAAAMETSHATLMSDVLRVPEAVRL  
840 GRCARRTIAVNVAGSVAVKAAVLALAAAWRPVLAAVLADVGTCLLVVLSMSTLLREEWKGGAKEDGACRATARS  
841 LVMRSQLAADSQAPNAADAGAAGREQTNGCRCCPKPGMSPEHSVVIDIRADGERQEERPAEAAVAKCCGGGGGGE  
842 GIRCGASKKPTATVVVAKCCGGGGGGEGTRCGASKNPATAAVVAKCCSGGGGGEGIGCGASKKPTATAVVAKCCGG  
843 GGEGTRCAASKKPATAAVVAKCCGGGGGGEGTGC GASKRSPPAEGSCSGGEGGTNGVGRCTSVKRPTCCDMGAAE  
844 VSDSSPETAKDCRNGRCCAKTMNSGEVKG

845 >PdHMA-A

846 VRALNQARLEATIRAYGTDSIIKKWSPYVVLACGALLLVSLFKKFFHPLQWFLALAAAAGVAPP IIFRSIAALRRF  
847 TLDINILMLIAVCGAVALGDYSEAGFIVFLFTVAQWLES RASYKAAAAGMSSLMKMAPQKAVLAETGQVVDARDVK  
848 IGTILAVKAGEV IPIIDGVVVDGRSEADERSLTGESFPVAKQAQSSVWAGTLNMDGYISVRTTALAEHSAVAKMAR  
849 LVEEAQNSRSKTQRLIDSCARYYTPAVVMAAGFAVIPLIIRVHNPKHWIELALVLLVSACPCALVLSTPVAAF  
850 ALLKAARTGLLVKGGDVLEALARIKVVAFDKTGTITRGEFAVVEFRSINNEVNLHALLYWVSSIESKSSHPMASA  
851 LVDYARSNSIEPKPDCVREFHIYPGEGIYGEIDGKNIYIGNKRIAARASCETVPELDDIKEGVTLGYIFSGTVAI  
852 GVFTLSDTCRTGATEAIKELKLLGIKTAMLTGDSAAAAMHAQNQIGHAIEELHAELLPEDKVCINDLKTREGST  
853 AMVGDGMNDAPALAMADVGISIGISGS AVAMEISHIALMSNDIRKIPKAIRLARKTHFKIIGNILFSAVTKIAIL  
854 ALAFAGHPLLWAAVLADV

855 >PdHMA-B

856 AVVIAAAGFAVIPSIMRVHNPKHWFQALVLLVSACPCALVLSTPVATFCALLKAARVGLLIKGGDVLEALARIE  
857 VVAFDGTGTITRGEFAVVEFC SIDSEIALHELLYVVASIESKSSHPMASALVDCARLNSIEPKPDCVKEFH IYPG  
858 EGICGEIDGKTIYIGNKRIAARASCETVPELVDMKEGVTGVGHVFSGTVPVGVFTLSDTCRTGSAEAIKELKLLGI  
859 KTAMLTGDS TAAAMHAQNQLGHAIEDLHAELLPEDKVRINDLKTREGSIAMIGDMNDAPALAMADVGISMGIS  
860 GSAVAMETSHITLMSNDIRKIPKAIRLARKTHFKIIGNIFFSIIITKIAILALAFAGHPLLWAAVLADVGTCLLVI  
861 LNSMMLLRTRTQKEKKCCGSSHKSPVQRTACANHC GKGACRSASPCGQLKSSSCLDEHSHCHGHNDAEELRMHNSC  
862 EKEDCHKESPSPCCQESVRHTMNASQEHLSITPALEHODDHLQKKHCRRHVACKHKPNIREDRSHVTS GDRP  
863 LASNSSRASANICSNNTKNKTGECCKSDWEECKR KDCSSPQEITREIGGCCRSYMKECGKKDSCCGGMIPEII  
864 TE

865 >PdHMA-C

866 MTDDIEAKVPSAMQKTTFTVLGICCGSEALVQKILNPLEGIENISVNVLAKTTTIVIHDPKISASQIVNALNKA  
867 KLKAGIRELGQVKTRKQSRPNANVIASGVLLLVAMFSYIYQPLVWVSLASIAIGILDMLRRCIAALGRCVLDINV  
868 LMVIAVFGAVGLGNYLEGASVVFLLTFLAQWLEAKSSDKAQASLESMLNLAPRTAVIAETGETVDVKDITINTLVS  
869 VKAGERVVDGLVVTGGSTIDESSLTGEMFVVDKEVGSKVWAGSVVLTGFINVATKALEEDSAVARMVKLVEDAQ  
870 SRRSNIIEFIEKFAKYITPGVVLIAAGIAVVPWALSFDIRHWIYLSLVLLVAVCPALVISTPVAKVCGLSAAA  
871 KMGLIIKGGNHLEALAKIKALAFDKTGTLEGSFKVVDMLQVLEQKIDINQLLYWISSLENLSGHP IAKALVEYAR  
872 FRGIQPSREVKDFKMSISGEGISAYVDDCLIQIGNAQLAFRNGWLSSESKFYIDEAGITVGYVGMNDHFIYGFRLGD  
873 QVRGEAAQAVHELQKQRIQVTILTGD SKAAAELIQKQIGENIKVEASLAPEDKMKKIAELKEKWGLTAMVGDGIN  
874 DAPALAASDIGIAMGVAGSAVATETADVALMSNDRKIPEAVKLARATLRKNYQNVALS LAVKLLFLGLAFGGMP  
875 SLWAAVVADMGTCLAVIFNSMLLLRKHKKEGSI AFDKSSEQLHVRVVEPGLDSECSRNLQENLEGLHEPLLPKER  
876 EEKEERPRSCCKGCRGGANGEEVDFR

877 >PgHMA1

878 ATDVVSTLKNQAALHLMMLTGDHASSASRVAKAVGIDEVYSGLKPEDKHLQVKALSRNGAGGLIMVGDGINDAPA  
 879 LAAATVGVIVLAQRASATAVAVADVLLLEDDIKSVFPIIAKARQTTSLVKQSVLLALSCIFFAALPSVMGFLPLWL  
 880 TVLLHEGGTLLVCVNSARALNDPTWSWTHDLRRVDDLVASISNILKQFSSSNVQAAPS  
 881 >PgHMA-A  
 882 AEVTEFQALHGEIGCVIEGHEIHIIGNARLASRLGWIQDSSNTWNSQGPTVGYVVDGKGFALVFSVADQIRPEAA  
 883 EAVRDLKKLGIQLAMLTGDSSTAAAIIEKEIGEIAVHSQLLPEDKVRIGELKQVGLTAMVGDGINDAPALAAAD  
 884 IGIAMGVAGS AVAMETSDIALMSNDIRKISAAVKLGRRSLNKIYMNVAISFLTAAIFSLAFTGHASLWIAVVAD  
 885 VGTCLVVFIFNSMLLLKREKRLNRHNNHHGHHHNDHNHHDHEHHHHHQISISGHQHNHGCNHNCHNNSTNLVSS  
 886 SREVNSSTPEIVVDVGNIHLDSSH  
 887 >PgHMA-B  
 888 MIGDGINDAPALAAADIGIAMGVAGS AVAMETSDIALMSNDIRKIAGAVKIGRRTLKRIYINVAISIVTKIVIFA  
 889 LTAVGLVYLWIAVLTVDVGTGMLVTFNSMLLLKGAARYRHGVCNHQDCDDRGRHWHKDNDDGDDHHHHVHGGSNRHHH  
 890 VHGGSNKHQADRNI EASADSTHTVQEADTCDVVECSACNFPTS IHGCAKPRTNRCCQNSYPPQVDLCASGNCRG  
 891 GKRQLGSSQLSDSRFGQRCIPPIITAVNLIKSEALKPVIQDSSNAAIPPIITVAILTST  
 892 >PpHMA1  
 893 MESLLHFPIPIRASNNHHSSLLSHHPTTTRLNSPSSPKPIIRAPLFRFKPLPPLRNSTTLRCTAYACDHDHDDHHH  
 894 HHHHHHHHHHHSDELDTGPOKQFVRFKAVRWTDLADFLREHLQLCFCSTTLFLAAAACPYLMPKLAVKPMQNAF  
 895 ILIAFPLVGVSAALDALTDISGGKVINIHLMALAAAFASVFMGNALEGGLLAMFNLAHIAEEYFTSRSMIDVKEL  
 896 KENYPDFALVLDINDEELPNTSNLAYKQVPVHDIQVGSFILV GAGESVVPDCEVFQGNATITIEHLTGEIKPLET  
 897 TVGDRVPGGARNLDGRIIVKATKTWKESTLSRIVQLTEEAQLNKPKLQRWLDQFGEQYSKVVVLSAAIALLGPF  
 898 LFKWPFIGTSACRGSVYRALGLMVAASPCALAVAPLAYATAISSCAKKGILLKGGHVLDALASCHTIAFDKTGT  
 899 TTGGLAFKAIEPIYGHRTNNISDFSSCCAPSCEKEALAVAAAMEKGTTHPIGRAVVDHSEKDLPSVSVESFEY  
 900 FPGRGLIATLNGIEGTGGDKLLKASLGSVDFITSLCRSEDASKKIKEAVNASSYGTEFVRAALS VNEKVTLIHLE  
 901 DRPRPGVSDVIEELRDEAKLRVMMMLTGDHESAWRVANAVGINEVYSSLKPEDKLSHVKDVS RDMGGGLIMVGE  
 902 INDAPALAAATVGVIVLAQRASATAVADVLLLRDNI SVVFPFCIAKSRQTTSLVKQSVGLALSCIVLASLPSVLG  
 903 FLPLWLTVLLHEGGTLVCLNSIRALNHPTWSWRQDLWHLVCELKSRLVLPKKNLNTSSNTAQPAVEQLRHSPL  
 904 >PpHMA-A  
 905 MAAQDKDKAAAKKFQKSYFDVLGGLCCSSEVPLVENILKPLEGVKEVSVIVPSRTVIVVHDSLLISQIQIVKALNQ  
 906 ARLEANVRLYGAEDNYKKKWPSPYAIASGVLLLLSFLKYAYRPLGWLALGAVVVGIFPIAMKGVAAIRHLRLDIN  
 907 ILVIVAVIGITIALNDYMEAGTIVFLFTVAEWLESRAGHRAKAVSSSILMSMAPQKAVLAETGEVVDVDEVKLNTTV  
 908 AVKAGEVPIIDGIVVEGKGEVDEKLTGESYPAKEKDSVTWAGTINLNGYLSVKTTALAE DCAVAKMAKLV EEA  
 909 QNSKTRTQRFIDKCAFYTPAVLVISVSI AVIPAAALHVNWSKWFHLALVVLVSACPCALILSTPVVTFCTLTKA  
 910 ATSGLLIKGGDYIEVLAKVKIMAFDKTGTITSGEFVVIDFQSLRDDISLNTLLYVVASIERKSSHPMADALVDYG  
 911 RSHSVEPKPENVEEFQNFPGEGIHGKIDQYIYIGNRKIALRANCVTVP TIEGRKGGKTIGYIYSGGTPAGIFTI  
 912 SDTCRSGAAEACRELKLGIKTAMLTGD SHAAALHANEQLKQALEVVHAE LLPEDKARIITEFKTEGSTAMVGDG  
 913 INDAPALATADIGISMGISGSALAOETGNIILLNDIRKLAKAVKHARRANRQVIONVVLSTTKVAI LALGFAG  
 914 HPLVWAAVLADVGTCLMLVILNSMLLLKGT EKHGGKCGKNSSAPHAHKHGHSHGSHSHKNQHCCSESKAVKACKPQ  
 915 KCSSQKCGSECQPSPLNSSLPGNHKHDDDLHKARHCDGASCMKLN RDLESQNKHNHGC SRPHNLSSCAEDGCTDL  
 916 VGSHGNCAEGDKIHEEKHCNHSTLLEENQKPI SNSHCHSTHCGKEHSRNEGDGLHEVNHRRNSDFPLEVSQKSAS  
 917 TAHCHSSHCGKEHGTKQGHGLHEAKHCNHSAPPLEESKNLASFGHCHPTHCGKDHI GNEASGKSAGTSCDHQHHH  
 918 HNLDEKTPPHTAIDIVPGNDHTESSPTHSCISSGTREEEACCSKSVAIHACVLEKREVGGCKSYMKECCGGHGH  
 919 IGPSFKGCLSEITTEQM  
 920 >PtHMA1-1  
 921 METTTLRHAIGVTDFFPSPSLSLSAAANNYYYHSSKLLVLRKRVIIHQSSLSKFPFNSLSHPPRSTNFNHRFILR  
 922 ATGHDHDDHDDHDDHDCCHHHHHEGGHDSQLTGPQRALLKFAKTLGWMDLANLLREHLQLCCCSAALFI TAAAC  
 923 PYIIPKPAVKPLQNALMLVAFPLVGVSAASLDALTDIVGGKVINIHLMALAGFASIFMGNALEGGLLAMFNLAHI  
 924 AEEFFTSRSVIDVKELKENYPDSTLVLDVNDKPPDVSDLSYKSVPHDIEVGSYILVGTGEAVPVDCEVFQGNA  
 925 TITIEHLTGEVPLEAKVGDRI PGGARNVDGRMIVKATKTWKESTLSRIVQLTEEAQSSKPKLQRWLDEFGEQYS  
 926 KVVVGLSIAIALLGPF LFKWPFMSTSVCRGSVYRALGLMVAASPCALAVAPLAYATAISSCARKGILLKGGQVLD  
 927 ALASCHTIAFDKTGTTLTGGLMFKAIEPIYGH LIRNRTNFTSCCIP SCEKEALAVAAAMEKGTTHPIGRAVVDH  
 928 SIGKDLPSVSDSFEYFPGKGLVATLNNIEGTGGGKLLKASLGSVEFIASLCKSEDESRIKKEAVNASSYGRDFV  
 929 HAALSVEEKVTLIHLEDRPRPGVSDVISELQDQARFRVMMMLTGDHESAWRVAKAVGISEVYCSLKPEDKLNQVK  
 930 GISRDMGGGLVMVGE GINDAPALAAATVGVIVLAQRASATAI AVADVLLLRDTISGVPFCIAKSRQTTSLVKQNV  
 931 LALTSIFLASLPSVLGFLPLWLTVLLHEGGTLLVCLNSIRALNDPKWSWRYDLQVVEKLSRVMLKVTGDTSS  
 932 TVEAAPL  
 933 >PtHMA1-2  
 934 MEATTLRHSLPFSFTYHSHLTSKLLPQKPFLLSNFSPFFLPGPPISITDATNHHHSHCHQNHGGHNSQLTGPQR  
 935 ALLKFAKTIGWMDLANLFRENLQLCFC SALSIFITAAACSCMIPKPAVKPLKNAFMLVAFSLVGVSAASLDALTDI  
 936 TDGKVINIHLIMALACFASVFMGNTLEGGLLFAMFNLAHIAEEFFTNRSVIDDVKELKENYPDSAFVLDVNDK  
 937 PDVSHLSYKSVPHDIEVDSYLV  
 938 >PtHMA-A  
 939 MAAELEKSNAATKKLQKSYFDVLGGLCCSSEVPLIENILKSLDGVKDFSVIVPRTVIVFHDDLISQLQIVKAL  
 940 NQARLEANVRAYGETKHQKWPSPYAMACGVLLLLSLLKYVYHPLRWFAGAVAVGILPICLKAVASLRNFRDIT

941 NVLMLIAVIGTIAMDDYIEAGTIVFLFTIAEWLESRASHKASAVMSSLMSIAPQKAVIAETGEEVDADEVKLNVT  
 942 LAVKAGEVIPIDGVVVDGNCEVDEKTLTGESFPVPKQVDSTVWAGTINLNGYMSVRTTALAEDCVVAKMAKLVEE  
 943 AQNSKSKTQRFIDKFAQYYTPAVIIISASVAVIPLALRLHDRNRWFRALVVLVSACPCALILSTPVATFCALTK  
 944 AASAGLLIKGGDYLETGLGKIKVMAFDKGTITRGEFVVTFDQPLCNDISVDTLTYWVSSIESKSSHPMAAALIDY  
 945 GKMHSIEPQPEKVEEFQNFPGEGIQGKIEGKDIYIGNRKIAHRASGTVPTLEGDKKTGKSVGYVYCGATLAGIFS  
 946 LSDSCRTGVAAEAIKELKSLGIKTAMLTGDSEAAAMYAHEQLEHALEVVAELLPEDKATIIKELKKEGPTAMIGD  
 947 GLNDAPALATADIGISMGISGSALATETGHVILMSNDLRKVPKAIIRLGRKSHRKVIENTVMSMTTKSAILALAF  
 948 GHPLVWAAVLADVGTCLLVILNSMLLLRGTGTHAGKCSKSSGASHSHKHGTKNSSHNHSSHNHRNCCSSQNKKVEE  
 949 GAQKCCSSPKVEQVQSGALNSTCASRCCSSPKVEKGPSGQNSSCTSGVCSSPKVEKVHSGAQNSSCASGCCSSQ  
 950 KVEKVQLAAQNSNCASGCCSSQKAEVKLVAAQNPSCDSGCCSRPKVEKVQSEDQNSNCASRCCSSQKAVKEHCVAQ  
 951 SSSLASGCQSSQHSISSCRNQECADSAKSHDARVATNASGVHEAKHHDHSCFNTVNPNTANHRSHDCSSPPKL  
 952 KHLCHNSVETQKGCSDGDGLHKEKHCHRSHGEPAAATHHGIHHSSSHSHDLEGSQKTTDNTTNCSSKSSCKNTID  
 953 IPKNEESLGEIVESSCSPQHQHQLHQLKCCCTGCAPPHTVIEIEPTTMHACMSMEKREIGGCCQSYMKECCSK  
 954 HGHFATGFGGGLSEITIEQV  
 955 >PtHMA-B  
 956 VMSSLMSIAPQKAVMAETKEEVDADDEVKLNVTAVKALVVMYLSLSGNVSVRRTALVEDCVVAKMAKLVEEAPN  
 957 SKSKTQRFI  
 958 VPTIEGDKKTGKTVGYVYVYATLAWIFSLSDSCRTGVAAEAIKELKSLGIRAAMLTGDSEAAAMYVQEQLDHALEV  
 959 VHAELLPEGKATIIKELKKEGPTAMTGDGLNDAPALAIADIGISMGISGSALAITGHLILMPNDFRKPVPTAIR  
 960 LARKAHRKVTENVIMSMSTKSAILALAFAGHPLVRAAVLADVSTCLLVIFNSMLLLRGTQHLGKCNKTS GALRS  
 961 HKHGNKNSHNHSDCCSIIKVEKVQCGSQKCCSSQRVEKVVPLVVALT  
 962 >RchMA1  
 963 METTALRHAIGVKGFPSVSYSSKQLAITRRRRSLDSLIFRPIISLNFHNRTVRCSTAHSKNHHDHNNHNNHNNH  
 964 HHHHHHHHHNNHSHGDVEELSGPQORALINFKAVKWIIDLANLLRENLOLCCSAALFVAAAACPYLIPNPVVKPIQ  
 965 NAFIIVAFPLVGVASLADALTDVTGGKVNIVHMLAALAFSSVFMGNALEGGLLLAMFNLAHIAEEFFTSRSMVDV  
 966 KELKESHPSALVLDVNDKLPDLSDLSYESIPVHVDKVGVSFILVGTGEAVPVDCEVFQGRATITIEHLTGEIKP  
 967 VEIKVGDRIPIGGARNLDGRIIVKATKMWKESTLNRIVQLTEEAQLNPKLQRWLDEFGEHYSKVVVGLSIAVALL  
 968 GPFLFNWPFIGTSACRGSVYRALGLMVAASPCALAVAPLAYAIAISSCARKGILLKGGQVLDALSSCHTIAFDKT  
 969 GTLTTGGLMFKAIEPLFGHELVNKNTNFTSCCIPSCKEALAVAAAMEKGTTHPIGRAVVDHSIGKDLPFVSVES  
 970 FECFPGRGLTATLNNIESATGRVLLKASLGSIEFITSCKSEDESRIKDAVKASSYGSDFVHAALS VNDKVTL  
 971 IHLEDRPRAGVDVIAELEDRARLRVMMLTGDHESASAWRVAKSVGISEVHYSKPEDKLNHVKGITRDMGGGLIM  
 972 VGEGINAPALAAATVGIVLAQRASATAIAVADILLRDDISGIPFCIAKSRQTTSLVKQNVALALTCIVLASLP  
 973 SVLGFLPLWLTVLLHEGGTLLVCLNSIRALNDPKWSWRELDLSHVVKEFNCRILIPRWDNTSSSGSIQAAPL  
 974 >RchMA-A  
 975 MAAQDKNKAAKKHQKSYFDVVLGCLCSSEVPLIENILKSLDGVKEYSVIVPRTVIVVHDNLLISQLQIVKALNQA  
 976 RLEANVRVKGDTSHQKKWSPFAVASGVLLLLSLKVFYHPLHLWALGAVAI GIFPILMKAVASLRNFRDLTNIIL  
 977 VLIAVVGTIVLKEYVEAGFIVFLFTIAEWLESRAGHKANAVMSSLMSITPQKAI IAATGEEVDADEVKLNVTAV  
 978 KAGEVIPIDGIVVDGNCEVDEKTLTGESFPVPKQKVDSTVWAGTINLNGYINVQTTALAEDCVVAKMAKLVEXXX  
 979 XXXXXXYYTPAVIIISVSLVVVPLALRVHNRNRWFRALVVLVSACPCALILSTPVATFCALTKAATSGVLIKGG  
 980 DSLETLAKIKVMAFDKGTITKGEFVVVDFGSLCEDISLDTLVYVWVSSIESKSSHPMAAALVDYAKSLSIEPNPE  
 981 NVVEFQNFPGEGIHGKIDGKEIYIGNKKIGLRAGYGTVPTLETETEMKGGKTVGYVYSGGTPIGIFSLSDACRTGVA  
 982 EAVTKLKSVMGVTAMLTGDSQAAMHAQEQLGHALEVVAELLPEDKARIIEEFKKEGTTAMIGDGVNDAPALAT  
 983 ADIGISMGISGSALATETGDVILMSNDIRKIPDVISLARKAHRKVIENVILSMSTKSAILALAFAGHPLVWAAVL  
 984 ADVGTCLLVIFNSMALLRGTGTHKHGGKCCSSATANTSKRDNNSSEHHHCCSDRKRVEITSCNSHESRSCASRQA  
 985 SDSSVCKPSCGEVHKCAHSDSHDGRKHCQHDTSSHVVLDLEANNPHKHSCDKVSTNCISNHSDHSIHTEEATQKMT  
 986 KADDHCHSNHCEKNHVNIIHIEDDSSEDIVESGVNHRPHHQLHGHGKCCGGHKSNGPCSSVNDIHQDLSNTGAT  
 987 IMHCMSLEKRETGGCKSYMKECCGKHGQFGTGGFGGGLPEIITE  
 988 >SbHMA1  
 989 MQFLSASASVSVSSPVPPSAHLLRLSRPPFPFLRRRCSPPKPLALTPRPPLLLASRPSLLFTPRAHGGHGHGHG  
 990 HHHHHGHHDHNNHNNHGHGHGHHEVDVHGGGGGAAMRVARAIGWASVADALREHLQACCISLGLLLIAAACPHVAL  
 991 LNSVGRQLQAALIAVAFPLVGVSAALDALVNIADGRINIIVHMLAALAFASIFMNALEGGLLLAMFNLAHIAEYF  
 992 TSKSMFDVRELKENHPEFALLLETSGEESVQFSNLSYTKVPVHDLEVGSHILVRAGEAVPVDGEVYQGSSTVTIE  
 993 HLTGETKPLERTVGDAIPGGARNLEGMMIVKVTKSWEDSTLNRIVQLTEEGQLNPKLQRWLDEFGEYYSRVVVA  
 994 LSLGVALGPLLKWPFFGNVSVCRGSIYRGLGLMVAASPCALAVAPLAYATAISSLASKGILLKGGHVLDALSS  
 995 QSIADFKTGTLTGKLMCKAIEPIHGLGVKNHNSPCCPTNCESEALAVAAAMEKGTTHPIGRAVVDHSVSKD  
 996 LPVVAVESFLECLPGRGVVATLTGVKVRNENELSEASIGSDYISSLYRSNGESEQIRAAKSSAYGPEFVQAAL  
 997 SVDKKTLLFHFEDEPRSGVCEVISTLREKAKLHIMMLTGDHESASAHRAKAVCIEEVHFSKPEDKLNKVKAVSR  
 998 EGGGGLIMVGDGINDAPALAAATVGMVLAQRASATAVAVADVLLQDNICGVVPCIAKARQTTSLVKQSVVALAL  
 999 CIVFAALPSVLGFLPLWLTVLLHEGGTLLVCLNSIRALNAPTWSLVDDIRQLVDSLRYFSSKFNSSSSNYVANT  
 1000 VTL  
 1001 >SbHMA2  
 1002 MGDAAVPAGTLQKSYFDVVLGICCPSEVPLVEKLLRPLPGVHTVTVIVPSRTVIVLHDAAATSPAQIVKALNQARL  
 1003 EASVRAYGSGSEEKANKWPSYVFLFCGVFLVVSLEFHFVWPLKWFALVAAAAGLPPIVLRSFAAARRLTLDVNI

1004 LMLIAVSGAIALKDYSEAGFIVFLFTTAEWLETRASHKATAGMSSSLMSMTPQKAVLAETGEVVSAQDVKVNTVIA  
1005 VKAGEVVPIDGVVVDGRSEVDESTLTGESFPVAKQPDSQVWAGTLNIDGYIAVRRTAMADNSAVAKMARLVEEAQ  
1006 NSRSKTQRLIDTCAKYYPVAVVMAAGVAVIPVAIRAHHLKHWFQLALVLLVSACPCALVLSTPVATFCALLTAA  
1007 RTGLLIKGGDVLETLARIKIAAFDKTGTITRGEFCVEEFQAVGERIPMQQLLYWVSSIESRSSHPMASVLVDYAL  
1008 SKSVEPKSDNVTEFQIYPGEGIYGEIDGEGVYIGNKRILSRASCETVPDMKDMKGVITIGYVACKGQIGVFTLSD  
1009 SCRTGSAEAIRELRLSLGIKSVMLTGDSSAAAASYAQNQLGNILDEVHPELLPEDKVRIVDELKAKHGPTLMIGDGM  
1010 NDAPALAKADVGVSMGVSGSAVAMETSHITLMSNDIRRIKAIQLARRTHRTIIVNIIFSVITKLAIVGLALS GH  
1011 PLIWA AVLADVGT CMLVIMYSMLLLRSKGRKAKCCASSQHGS HAKKHCVSRHCS DGPCKSTGCSKESSAGKHG  
1012 CHDHGHAHTHCKEPSSQHPTEKHACHDHGHSNHCKEPSSHVVTEKHVCHDHGNTHNHCKEAGNQLLLVEGHGCH  
1013 DRDHGHSHEHTGKQDCHGHEHSHCKEKPTRADSEGACHGHGHDHGHEHRHCEGDSHSHATGELGCHEHSTVEHA  
1014 CEHQCHAEQQTVHTAETHHCHDHEHGQHKHDHGEIEEPEKDCHDHS HCCHEPHDKDKTPAEPVEEVTISIAALP  
1015 KDEGHHHSEEHKGEHC GKAKDCGVPAPTDC AASKNCCSVKGGDTCSSSQ AACAKETSPCCRSYVKCPKTTATVTR  
1016 SSCCGHSHTMLKLPEIVVE  
1017 >SbHMA3-1  
1018 MRGGDSPAKAPAEAAALEERLLPPPVT RSGDAGAGGGKRGGSKWEKTYLDV LGVCCSAEVALVERLLKPIDGVRS  
1019 VTVVVPSRTVVVEHDPAAVSQSHIGAQQGLEASVRAYGSTSGGVGVVARWPSYVVASGGLLLASLLAPLLPPL  
1020 RWLALAAACAGAPPMLLRALASGLALALDINALMLVAVAGAAALGDYAEAGAI VFLFTTAEWLETLACTKASAGM  
1021 STLLTMVPPRVVLAGTGEVVSVRDVEVGT VAVRAGEVVPVDGVVVDGQSEVDESSLTGESFPV PKLPPSEVWAG  
1022 TMNMDGYIAVRTTALADSTVARMQRLVEAAQNSRKTQRLVDSACKAYYTPGVVVLAAASVALVPLLGA KDLKRW  
1023 CQLALVLLVSACPCALVLSTPVATFCALLRAARMGVLIKGGDVLES LG EIRVAAFDKTGTITKGQFSIDGFHVVG  
1024 DKVEMSQLLYWVSSIESKSSHPMAAALVEYSQSKSIQPKPENVTFRIFPGEGISGVINGRQIFIGNRRIMARSS  
1025 CYTAPEMDDHRGASIGYIVDGD LVGAFSLSDCRTGAAEA IMELRSMGIKSVMLTGD SRAAATRAQQQLGGVLE  
1026 ELHWELLPADKVSLVGLKARAGATLMVGDGMNDAPALAAADVGVSMGLSGSAAAMETSHATLMSSDILRVPAAV  
1027 ALGRCTRATIAANVVSVGAKAAVLALAVAWRPLLWAAVLADVGTCLLVVLHSM LLLREPAGTGSWRRRGGPPEA  
1028 CRATARSLAMRSQLDGASNGGAAGGSVRREPGCRCCQKPRKPFQEHA AVVIDIPAPSADAEHPRATAKGDATGC  
1029 CGGARVACAAPT TTVTSVNCAPRGCCGGKGGKDSRVSARTSCSSNGGGGAARDPPKAGNGCNARCCSSGK  
1030 >SbHMA3-2  
1031 MPGPAVEAAAKGGGHHHDGGHHHDGHGCGGGKAAAGSKWEKTYLDV LGICCTAEVALVERLLSPIHGVRAVTVV  
1032 VPSRTVIVDHD TAVVSQFHIVKVLNKAGLEASIRAYGSSAGASWRWSPFIIACGVLLAASL FAPLLPPLQWLAV  
1033 VAAVVGSPMLLRFAFAAGKLTLDINILMLIAVVGVALGYSYTEAGAI VFLFTVAEWLETLACTKASAGMMSLMS  
1034 TVPKTVVLAETGQVVGMGDVAVGT VAVRAGDVVPVDGVVVDGHHSEVDESSLTGESFPV PKQFQSEVWAGTINLD  
1035 GYISVRTTALAE NSTVAKMERLVEDAQAASR TQRLIDSCAKHYTPAVVVI AATVVVVVPA LLGSRDL EHWFRLSL  
1036 VLLVSACPCALVLSTPVATFCALLRAARMGLLIKGGNVLES LG EVSVAAFDKTGTITRGEFSIKDFLVVGDKVEM  
1037 NKLLYWVSSIESKSSHPMAAALVDYAQSKSIQARPDDVTETCIYHGEGIYGEINGKKIYIGNERIMARSSCHQHA  
1038 AAHQETDGLMKGVSMGLVICDGD LVGKFLSDTCRTGAAEA IQLKSMGIKSVMLTGD SAAAAKHAQEQLGGVLE  
1039 ELHAGLLPEDKVRLIRELQTRHGATMMVGDGMNDAPALAAADVGISMGLSGSAAAIETSHATLMSGDILRVPKAV  
1040 RLGRRTTRTIALNVASSVATKAAVMALAVAWRPV LWVAVLADVGTCLLVVLHSM LLLRDAGRARRRCGGGASKGG  
1041 CCGTPHKAPKACSS TAACKSPKSCSTPTKSPKACCGT MTPVATRPQHAETAGGDHSHKHGKDGHHHC SHNLSKL  
1042 PEDAVVIAIPGPRAVEHRKDAAGHEKADGHGGAGGCCGGHGASPTAAHGASGCCASGHGEEVCIVISGRSPCC  
1043 STARSRSRSGPKDAICCHGSGGKDGGAISALVC  
1044 >SlHMA1  
1045 MEALRLSTFSGINCSIYKSTRRLKVN RNLFSLSLKPISVPIRSSAQFRGR IHCASCSSSHSHQH HHHHHHDHS  
1046 HDHNNHHHHHHHHGHDEGDGKLTKFQEVFLKFANAI RWTQLANYLRENLELCCCSAVLFI AAAVCPYFLPGPAVL  
1047 PLQRIFALIAFPLVGV SASLDALVDITGGKINIHVLMALAAFA SVFMGNVLEGG LLLAMFNLAHIAE EYFTSRSK  
1048 GDVKELKENHPEFALV LHVDNQTLP SFTDLSYIEVPVSDLEVGSFILVKAGESVPVDCEVSRGRSTITIEHLTGE  
1049 VKPLDKKEGDNIPGGARNLDGMLIVKAKKTWKESMLSRIVQLTEEAQLSKPRLQRWLDKFGEQYSKAVVLLSLAV  
1050 AFLGPPFFFKWPFSTTACRGSYRALGLMVAASPCALAVAPLAYATAISACAKR GILLKGGQVLDALASCHSIAF  
1051 DKTGTLTTFEFMCKAIEPIHGHA KSVGKGFASCCNPSC EKEALAVAAAMERGTTHPIGRAVVDHSTGKDLPSISV  
1052 ESFENLPGRGIIATLSSFE PRLGGGKPKWKAFLGSVEYITSLC DSEDESRRVEEAVSTSSHGVDFVRAALSVNNQK  
1053 VTLFHFEDKPRPGVLDVIQTLQNAKLRVIMLTGDHKASAKRVAKT VGIKEVNC SLKPEDKLYHVTSISRDTGGG  
1054 LIMVGDGINDAPALAAATVGI VLAERASAAAVAVADVLL LQDNISGV PFCVAKSRQTTSLVKQNVVLA LCSII LA  
1055 SLTSVMGFLPLWLTVLLHEGGTLLVCLNSVRALNPPTWSWREDISQIIDRLRSLIMFLRHGTL PSTIQA AHL  
1056 >SlHMA-A  
1057 MKESEKINNDINKLSKSYFDV LGICCTSEVV LVEKILKNLDGVREVS VIVT TKTIVIVTHDALLISQQQIVKALNQ  
1058 ARLEASIRVKGLQNYQKKWSPFAIGSGILLALSFLKYFYQPLQWLALVAVAVGIPPIIFRGIAAIRNFTLDINI  
1059 LVLIAVAGSIVLHDYWEAATIVFLFTTAEWLES RASHKANAVMSSLVNIVPPTAVLAENGEVVNV DQVKNLSVLA  
1060 VKAGETIPIDGIVVEGEC DVDEKTLTGESFPVSKQKDS TVWAGTTNLNGYISVKTTALAE DCAVARMAKLVEDAQ  
1061 NKKSKAERYIDKCAKYYPVIVVIAAGFAIVPTALRVHNLKEWYRLALVALVSACPCALVLSTPVAMCCALSKAA  
1062 TSGLLFKGAEYLETLAKIKIMAFDKTGTITRGEFAVTEFRSLIDGLSLNTLLYWVSSIESKSGHPMAAALVDYAQ  
1063 SNSVEPKPDRVEQFQNF TGEGIYGRIDGMEIYVGNR KISSRAGCTTVPEIEGGDSLQGKSVGYIFLGSSPAGLFR  
1064 LSDVCRGTGVKDAMRELKQMGIKTVMLTGD CYAAANHVQDQLHGALDEFQAE LLPEDKATI IKG FQKEAPTAMIGD  
1065 GLNDAPALATADIGISMGISGSALAKETGHVILMTNDIGRIPKAA CLARRVRRKIIENMIIAIGTKGAI VALAIA  
1066 GHPLVWAAVLADAGTCLLVILNSMLLLRGATRRHEKKICKSSTSSH AHKKDKASCCKSEKTPQCCSDIESQKE

1067 CRKKSCSSEVCVQRCQPIPSGSTSCVNDQORSdstQNNGHQSHSHPQCCSSKMSVTACQSAVSESKSCGSNNCSDS  
1068 IRKSSCHSSTNSLISSSDLAPQCHSATSSSKSCGGTKRSNLSDKSCCRSLEIPQTCSTKKAHGCYSEVSGPKS  
1069 CGNSKCSdstDNNIHSHSDRQTCTSKVCAQSPSATSSSMTCGNTKCSdstTSKISCHSHANSEPCSSKKSgPtc  
1070 QNANSgSMIFGDnKSLDSVDIHECHSHAHPPHKEEPHHSVGHGCSdKEHDHSHPEKAFDSCATQECFsvQDHSI  
1071 DISENGsQGTdHCDsIKQSMVIPCCKHTPQEKVSHCGFHSTTPTDEELAKLVRRCdYRCPCHNVRSGCRNHAT  
1072 ECGPTTRSTINILrDNHHHHLDCsGRKVCSPiEKRHIGGCCESFRKECCPKNIHFASSFGGLSEIVLE  
1073 >StHMA1  
1074 MEALRLSTSFAGINCSiYKSTRRLKVNRLLLSSLPKSSVPIRSSAQFRGRiHCSACSCSSSHSHHHHHHDHSHD  
1075 HNNHHHHHHPDEGDGKLTkFQEVFLKfANAIrWTQLANyLRENLELCCCSAVLFIAAAVCPYFLPKPAVLPLQR  
1076 IFALIAFPLVGVsASLDALVDITGGKINIhVLMALAAfASVFMGNVLEGGLLAMFNLAHIAEEYFTSRsKGDVK  
1077 ELKENHPEFALVLHVDNQTLPsFTDLsYIEVpVSDLEVGSFILVKAGESVPVDCEVSRGRSTITIEHLTGEVKPL  
1078 DKKEGDNIpGGARNLDGMLiVKAKKTWkESMLSRiVQLTEEAQLSKPRLQRWLDKfGEQYsKAVLLSLAVAFLG  
1079 PFLFKWPFfSTTACRGSiYRALGLMVAASPCALAVAPLAYATAISACAKRGILLKGGQVLDALASCHSIAFDKtG  
1080 TLTtTGEfMCKAIePIHGhAKSVGKGfASCNPSCeKEALAVAAAMERGTThPIGRAVVDHSAGKDLPSISVESFE  
1081 NLPGRGIiATLSSfEPRLGGGkPWKAfLGSVEYITSLCDSedESRRVEEAVNTSSHGVDfVRAALSvNNQKVTLF  
1082 HFEDKPRPGVLDVvQTLQnQAKLRVIMLTGDHEASARRVAKTVGIKEVNCsLKPEDKLYHVTSISRDtGGGLIMV  
1083 GDGINdAPALAAATVGiVLAERASAAIaVADVLLlQDNISGVPfCVAKSRQTTSLVKQNVVLAALCSiILASLTS  
1084 VMGFLPLWLTvLLHEGGTLLVCLNSVRALNPPTWSWREDISQIIdRMRSLVMFLRHGTLPSTIQAAHL  
1085 >StHMA-A  
1086 MKESEKINSDINKLSKSYFDVLGICCTSEVVLVEKILKNLDGvKEVSVIVTtkTVIVTHDSLliSQOQIVKALNO  
1087 ARLEASIRVKGLQNYQKKWSPFAIGSGILLALSfLKYFFLPLQWLALVAVVVGIPPIIFRGIAAIRNFTLDINI  
1088 LVLIAVAGSIVLHDYWEAATIVFLFTIAEWLESRASHKATAVMSSLVNIvPPTAVLAENGEVVNDQVKLNSILA  
1089 VKAGETIPIDGIVVEGECdVDEKTLTGESFPVSKQKdstVWAGTTNLNGYISVKTTALAEDCAVARMakLVEDAQ  
1090 NKKSKTERYIDKCAKYTPAIvVIAAGLAVVPTALRVHNRKEWYRLALVALVSACPCALVLSTPvAMCCALSKAA  
1091 TSGLLFKGAeYLETLAKIKIMAFDKTGTITRGEFAVTEFRSLIDGLSLNTLLYwVSSIEsKSGHPMAALVDYAO  
1092 SNSVEPKPDRVEQfQNFtGEGiYGRIDGMEiYVGNRKISSRAGCTTVPELEGDSIEGKsvGYIFLGSSPAGIFTL  
1093 SDVCRtGVKDAMRELKQMGiKTVMLTGDCYAAANHVQDQLGGALDEFQAEllPEDKATIiKGFQKEAPTAMIGDG  
1094 LNDAPALATADIGISMGISGSALAKETGHVILMTNDIGRIPKAARLARRVRRKIIEENMIIAIGTKGAIVALAIAg  
1095 HPLVWAAVLADAGTCLLVILNSMLLLRGATRRHEKKCKSSTSSHAHQHESKASCKSEKAPQLCCSDIESQKEC  
1096 RKQCSSEVCVQKRQPSFGSTSSGNQCSNSIENGGHSHSHSHPOCCSSKMSVTACQSAVSESKSCGSNNCSD  
1097 SIHKSSCHSLTNSSISSDMSAPRCHSATSNKLSKSTKSSNLSDKNSCRSHAIpQTCSTKKAHGCHEVSGPK  
1098 SCGNSCSDSRDNNIHSHSDHQTcASKVCAPQSPSATSSSTCGKTKCSNTTSKNSCHSHANSEPCSSKKSgPA  
1099 CQNANSgSMICGDnKSLDSVDIHGCHSHAHPPHKEEPHHSVGHGCSdKEHDHSHPEKSYDSYATQDCCFsvQDHS  
1100 IDISENGTAHCDsIKQSMVIpSSCKHTPQDQVSHCGFHSTTPTDEELAKLVRRCdNYRCPcheVRSgyrkHAAEC  
1101 GPTTRSTINILrDNHHHHLDCsGRKVCSPiEKRHIGGCETFRKECCPKNIHFASSFGGLSEIVLE  
1102 >TaHMA2  
1103 MGDSAAPAGKLEKSYFDVLGICCPSEVPLVEKLEPLAGVHKVTVVVPsRtVIVLHDAAAISTAQIVRALNGARL  
1104 EASVRAYGGAGQSKVSNKWSPYVLVCGVLLVVSLEFHFWRPLKWFAVAGAAAGLPPIVLRSVAALRRRTMDVNI  
1105 LMLIAVAGAIALKDYSEAGFIVFLFTIAEWLETRACGKATAGMSSLMsMAPQNAVLAETGQVVATQDVKINTVIA  
1106 VKAGEVVPIDGVVVDGRSEVDESTLTGKSFPVSKQTDsQVWAGTLNIDGYISVrTTAMADNSAVAKMARLVEEAQ  
1107 NSRSSTQRlidTCAKYTPAVIFMSAAVAVIPVCVKARNLRHWFELALVLLVSACPCALVLSTPvATFCALLRAA  
1108 RTGLLIKGGDVLESLASIKVAAFDKTGTITRGEFSVEEFQTVAGSERVSKQQLVYwVSSIEsRSSHPMASALVGYAO  
1109 SNSVEPKSENAIEFQIYPGEGiYGEIDGEGYVGNKRILARASICQTVPDIVEHMKGVTiGYVACNKELIGVfSLS  
1110 DSCRTGAeAIEKELRSLGIKSVMLTGDSTAAATYAQNQLGNILAEVHSELLPEDKVRIVDELKARDGPTLMIGDG  
1111 MNDAPALAKADVGSMGVSGSAVAMETSHITLMSNDIHRIPKAIKLARRThRTIVVNIvFsvTTKLAIVALAFAG  
1112 HPLIWAAVLADVGTCLLVIMYSMLLLREKGSgKvAKKSCASSHSRKHGHGTSHHCSDGHHHEHVSAGKHSSCHDH  
1113 HHEHDHhKEPSNLHSTGKHGCHDHHHEHDHhKEPSNLHSTDKHGCHDHGHGSHSCKETSSQMVtSKHVSHGHHT  
1114 HNICNPHTANKHDCHDHEHNHhQEPNSSHSADEHDCHDHKCEEPISLLCATEHACHDQNEHHYCDEEQTVHV  
1115 ADAHSCHGHKHDDSAADVPPELSISIESALPDHHEQEIQCIEKHEEACGHHLKVKDHPAPtDCSRGNCHSTVS  
1116 SKGCEsKGKEVCSSWPVGRtGIVRRCCrTRARSCSSHMLKLPEIIVE  
1117 >TcHMA1  
1118 METHSISLTKfSPLSRPRCLSRVNTfKfKPFILSPVIIRHKSLSLTLRSPHLRIRCVANHDHDHhFNHHHHHDH  
1119 DHHHHHHHDSAKLSGPQGAViGfAKAVRWMDLANYLREHLQLCCATALFLAAAACPYLLPKPAVKPLQNSFLFV  
1120 AFPLVGVSAALDAITDIAGGKvNIhVLMALAAfASVFMGNALLEGLLAMFNLAHIAEEFFTSRSMVDVKELKEN  
1121 YPDSVVLNLDdDNLpNVSNLSYrNVPVHDVEVGSYILVGTGEAVPVDCEVfQGSATITTEHLTGEIKPLEAKVG  
1122 DRIPGGARNLDGRMIVKVTkTWKESTLSRiVQLTEEAQLNKPKLQRWLDKfGERYSKVVVSVTiAVLGPFLFK  
1123 WPFISTAVCRGSiYRALGLMVAASPCALAVAPLAYAIAVSScARKGILLKGGQVLDALASCHTVAFDKtGTLTtG  
1124 GLMFKAIEPIYGHfIGNKKTnFTSCCIPsCEVEALAVAAAMEKGTThPIGRAVVDHSIGKDLPSVSVESFEYfPG  
1125 RGLIATLNSAKSGTREGKMLKASLGSVEFITSLCKSEDESrKIRAAVNASTYGSDFVHAALSvNEKVTLIHLEDR  
1126 PRPGVLDVISELKDQAKLRVMMLTGDHKSSAWRVANAVGINEVYCSLKPEDKLNHVKRISRETGGGLSMVGEgIN  
1127 DAPALAAATVGiVLAHRASATAIaVADVLLlRDNIscVpFSIAKARQTTSLVKQNVALALTCiILASLPSVLGFL  
1128 PLWLTvLLHEGGTLLVCLNSVRALNDPSWSWKQDVLHLISKLKSELTLRHNTSSSTTQAPAPL  
1129 >TcHMA-A

1130 MSSLMSIAPQKAVIAETGEEVDADEVKLSVTLAVKAGEVIPIDGIVVDGKCEVDEKTLTGESLPVTKEKDSTVWA  
1131 GTINLNGYISVKTTAVAEDCVVAKMAKLVEEAQNNSRTQRFIDKCAQFYTPAIVIVSAAIAVIPAALRVHNLHN  
1132 WFHLALVVLVSACPCALILSTPVASFALTKAATSGLLVKGGDYLEILSKIKITAFDKTGTLTRGEFVVTDFRSL  
1133 CEDISLNTLLYWVSSVESKSSHPMAAALVEYGRSHSIEPNPETVEDYHNFPGEGIYGRIDGRDIYIGSRKISLRA  
1134 HGTVPSPLEGNMIEGKTIGYVFSGATPAGIFRLSDACRTGAAEAVNELKSMGIKAAMLTGDNQAAAIHVQEQ  
1135 >ThHMA1  
1136 VGSYILVGTGEIVPVDCEVYQGSATITIEHLTGEIKPLEAKAGDRVPGGARNLDGRMIVKATKAWNESTLNRIVQ  
1137 LTEEASHNKPKLQKWLDEFGENYSKVVVLLSLAIAFLGPFLFKWPFLLSTACRGSVYRALGLMVAASPCALAVAP  
1138 LAYATAISSCAKKGILLKGTQVLDALASCHTVAFDKGTGLTTGGLTCKAIEPIYGHQGGNSLVTTCVNPCEKE  
1139 ALAVAAAMEKGTTHPIGRAVVDHVSVDLPSIFVESFEYFPGRLTATVNGVESVAEESRLRKASLGSIEFITSL  
1140 FKSEDDSKQIKDAVNASLYGNEFVHAALSVDQKVTLIHLEDQPRPGVSGVIAELKSWGRLRVMMLTGDHDSAWR  
1141 VANAVGITEVYCNLKPEDKPNHVKNIARDAGGGLIMVGEINDAPALAAATVGIVLAQRASATAIAVADILLLRD  
1142 NITGVFPFCVAKSRQTTSLVKQONVALALTSIFLAALPSVLGFLPLWLTVLLHEGGTLLVCLNSVRGLNDPSWSWKQ  
1143 DIAHLINKLSSRESTSSNNLSLSSVEPAH  
1144 >VvHMA1  
1145 METLPFRGVPSLSCARRRVNNSFEPFHRTLFFYNLSLPSKSLFPPLNFPLLPRHRALQFVAKAEDSHHHHHHPHN  
1146 DHHHDDHHHHGHGHGHGHGHGHGSGSTLSRTQESFLRIAKAIRWADLADFLRENHLCCCSTGLFLAAAACPYLI  
1147 PKPAVKPLQNAFIFVAFPLVGVSAALDALIDITGGKVNIVHLMALAAAFASVFMGNPLEGGLLLAMFNLAHIAEY  
1148 FTSRSVVDVKELKENYPDFALVLEVNNNKPPNFSLAYKKVPVHDVEVGSYILVKDGEFVVPDCEVFQGRSTITI  
1149 EHLTGMKPVERTVGERIPGGAHNLSGMMIVKATKTWKESTLSRIVQLTEEAQLNKPKLQRWLDEFDHYSKVVV  
1150 VLSIAVAFIGPLLFKWPFI STSVCRGSVYRALGLMVAASPCALAVAPLAYAIAISACARKGILLKGGHVLDALAS  
1151 CHTIAFDKGTGLTSGKLTFKAIEPIYGHGVRAYRSKFVSCCIPSCIEALAVAAAMERGTHPIGRAVVDHCVGK  
1152 DLPPVAVENFESLPGRGLSATLTSIESGIGGELLKASIGSLEYILSLCKSEDELKKIKEAMSTSSYGSDFVHAA  
1153 LSVNKKVTLHLFEDEPRPGVLDVILALQDQAKLRVMMLTGDHESAWRVANAVGIKEVYCSLKPEDKLNHVKSIS  
1154 REAGGLIMVGDGINDAPALAAATVGIVLAQRASGTAIAVADVLLLRDNI SAVPFCVSKSRQTTSLVKQONVALAL  
1155 SCILLASLPSVLGFLPLWLTVLLHEGGTLLVCLNSVRALNEPTWSWKQDLVPVVDKFKSTIMFLRRHTTSSSTR  
1156 AAPL  
1157 >VvHMA-A  
1158 MATKKWQKSYFDVLGLCCSSEVPLIEKILKPLDGVKEISVIVPSRTLIVVHDNLLISQIQIVKALNQARLEANVR  
1159 IYGEVAYQKKWSPFAIVSGILLLLSFLKYVYQPFWRWALGAVAAGIFPIAWRGIVAIRNFTLDINILVLI AVIG  
1160 TIALNDYWEAGSIVFLFTIAEWLESRASHKATAVMSSLMSIAPQKAVIADTGEIVEANSVLDTI IAVKTGEVIV  
1161 IDGIVVEGKCEVDEKSLTGESFPVAKQKSTVWAGTINLNGYISVKTTALAEDCVVAKMAKLVEEAQNSKSKTQR  
1162 FIDKCTKFYTPVVVLI SAGLAGIPAALRVHDL SHWFHLSLVVLSACPCALILSTPVATFCALSKAASVGLLIG  
1163 GEYLEILAKIRIMAFDKTGTITRGEFVVKDFQSLRDDVSSDTLLYWVSSIESKSSHPMAAALFDYGLSQSVEPKP  
1164 ENVEEFQNFPGEGIHGKIDGKDIYVGNRKIALRAGCETVPTIGEDKEGKTIGYVYSDATPTGIFTLSDACRTGVV  
1165 EAIKELKLLGIKSAMLTGDSHASAMHTQDQLGHTLEVVAELLPEDKARI IKDFKEEGPTAMIGDGVNDAPALAT  
1166 ADIGISMGIAGSALATETGHVVLMTNDIRKIPKAVRLARKTHRKVVENVILSITTKAAILALAIAGHPLIWA AVL  
1167 ADVGTCLLVIFNSMLLLRGTHQHGGKCKSSAASHVDKHGCKGGGSHSHNHQHSCSNSISQKKCEPQKCSSQRC  
1168 ASRCQPDHSLSSCVNTKCTDSADRHDCCVGNEGHDMQHCDQRSNTATHGTELHNKPNHSCSGHSFPLCVKD  
1169 EGANLVDRLCDGGGDGFHESKHCKHGGCDMVNHTISCSTSNHQHHSIALTDSRQQMPNNGHCQKIPC IKNHVKN  
1170 HSKDEVGHEVRSECKKHGMDSSAPLHASTDLELGTGLVESTGKHACMSLEKREVGCCSKFRKECCGKHGHFGAG  
1171 FGAGLSEIITE  
1172 >ZmHMA1  
1173 MQFLSASASASSLVPPSAHLLRLSRPQFPQQLRRRSPPRPLALTPRLPLPLVSRPSSLSTPRAHGGHGHGHGHGHG  
1174 HDHHHHHGHGHGHGHGHHEVDVHGGGGGAAMRVARAIGWANVADALREHLHLCCISLGLLLIAAACPHVALLNSVS  
1175 RLQAALIAVAFPLVGVSAALDALVNIADGRINIVHLMALAAAFASIFMGNALGEGGLLLAMFNLAHIAEYFTSKSM  
1176 FDVRELKENHPEFALLLETSGEESVQFSNLSYTKVPVHDLVGVSHILVRAGEAVPVDGEVYQGSSTVTIEHLTGE  
1177 TKPLERTVGD AIPGGARNLEGMMIVKVTKSWEDSTLNRIVQLTEEGQLNKPKLQRWLDEFGEYYSRVVVALSLVV  
1178 ALLGPLLFKWPFFGNSVCRGSIYRGLGLMVAASPCALAVAPLAYATAISSLASKGILLKGGHVLDALSSCQSI AF  
1179 DKTGLTTGKLMCKAIEPIHGH LGVKSGRSNPSCCTPNCESEALAVAAAMEKGTTHPIGRAVLDHVSVDKELPVVA  
1180 VESFECLPGRGVVATLSGVKVR ENENELSEASIGSVDISSLYRSNGESEQIRAAAKSSAYGPEFVQAALSVDDK  
1181 VTLFHFEDPRSGVCEVISTLREKAKLRIMMLTGDHESAWRVAKAVCIEEVHFS LKPEDKLNKVKAVSREGGGG  
1182 LIMVGDGINDAPALAAATVGMVLAQRASATAVAVADVLLLRDNICGVPFCIAKARQTTSLVKQONVALALTCIVFA  
1183 ALPSVLGFLPLWLTVLLHEGGTLLVCLNSIRALNTPTWVSLVDDIRKLVDSL RNYFSPKFNSSPSSYTANTAPL  
1184 >ZmHMA2  
1185 MGDAAAAGTLHKSIFDVLGICCPSEVPLVEKLLRPLPGVRTVTVIVPSRTVIVLHDAAATSPAQIVKALNQARLE  
1186 ASVRAYGGGSDGRQAAGSKRWSPYVLLCGLLLVLSLFLERLWPLKWCALAAAAAGLPPIALRSFAAARRLTDV  
1187 NILMLIAVSGAIALKDYSEAGFIVFLFTTAEWLETRASHKATAGMSSLMSMAPQKAVVAETGEVVAAQDVKVGTV  
1188 LAVKAGEVVPIDGVVVDGRSEVDESTLTGESFPVAKQPEVWAGTLNIDGYIAVRTTAMADNSAVAKMARMVEE  
1189 AQNSRSRTQRLIDTCAKYYPVAVVMAAGVAVVPPVVRAHNLKHWFLALVLLVSACPCALVLTSPVATFCALLT  
1190 AARTGLLIGGDVLET LARIKIAAFDKTGTITRGEFSVEEFQAVGERVTTPQLLYWVSSIESRSSHPMASVLVDY  
1191 AQSKSVGPKSDNVAEFQIFPGEIYGEIDGEGVYIGNKRILSRASCETVPMKMDKGVTVGVYVACKGQLIGVFTL  
1192 SDSCRTGSDEAIRELRLSLGIKSVMLTGDSSAAASYAQNQLGNILDEVHSELLPEDKVRIVDELKAKHGPTLMIGD

1193 GMNDAPALAKADVGSMGVSGSAVAMETSHITLMSNDIRRIPMAVQLARRTHRTIVVNIVFSVITKLAIVGLALA  
1194 GHPLIWA AVLADVGT CMLVIMYSMLLLRSENGGRKVKKCCASSQHGS SHARKKHCVSHHCSDGPCNKSTAGCS  
1195 KESPSAGKHACSDHGHATHCKEPSNHRPERHACHDHGSHNHCKEPPSSHVVTEKHVCHDHGNTSHSCEEAGNQL  
1196 LLVESHG CNDHGHGSHDRCKELSSPRFTSKHECHDHEHSHCKEKP KTPCADSEAAACHGHGHEHRHCEGDSHSH  
1197 ATGEHG CHEHDAHSHCEEHGHSDTAVEHACEHECHGEHQTVHAVETHHCHDHDHEHGQHELGEIEEPEKDC HDHS  
1198 HHCCEHPHGKDKVA AEPVEEVTISIAALPKDEGHHHSEEQHNGEHCRKAKDCGGGGGAAPT DCAASKNCCGVKGG  
1199 DACSSVQAARARETGPCCRSYVKCPR TAAASRSSCCGHSM LKLPEIVVE

>ZmHMA3-1

1201 MGSVEERLLPPPPARSADAGAGGAKSGKWEKTYLDVLGVCCSAEVALVERLLKPIDGVRVAVTVVPSRTVIVEHD  
1202 LAAVSQSHIVKALNKAGLEASVRAYGSSGVVARWPSPYTVASGALLLASLFAPLLPSLRWLALAAACAGAPPMVL  
1203 RALAAGLALDINALMLVAVAGAAALGDYAEAGAI VFLFTTAEWLET LACTKASAGMSSLMS MVPPTV VLAQTGEV  
1204 VGV RDVGVGAVVAVRAGEVVPVDGVVV DGOSEVDESSLTGESFPVPKQQAQEVWAGTMNLDGYIAVRTTALADNS  
1205 TVARMQRLVEAAQNSRSKTQRLVDS CAKYYTPAVVAVAAGVALV PLLLGP RGAQDPKRWFQLALVLLVSACPCAL  
1206 VLSTPVATFCALLRAARMGVLIKGGDVLES LGEIRVAAFDKTGTITKGEFSVHGFHVVDKVGMSQLLYWVSSIE  
1207 SKSSHPMATALVEYAQSKSIQPEPTSVTDFRIY PPEGISGAINGRQIFIGNTRIMARSSCYAAGAGPEMEGQQGA  
1208 SIGHVIVDGDHVA AFSLSDDCRTGAAEAIRELRSMGIRSVMLTGDSKAAA SRAQRQLGGALEEVHSELLPADKVA  
1209 LVGDLKARAGPTLMVGDGMNDAPALATADVGVAMGLSGSAAAMETSHATLMSSDLLRVPAAVRLGRRARATVAAN  
1210 VIASVGAKA AVLALAAAWRPALVWAVLADVGTCLLVVLHSM LLLWDPAGAGWRRRGGGGDPEACRATARSLAMRS  
1211 QLAEASNGAAGTAQGRRPGGGT KAGCHCCRETSE PSEQDHTAVVV DIPA PSAERPGVVAPTAATGCCSSSAREAC  
1212 ATPTT VTTVNSAPRGCCGGIGEGDTRENARTSCCTDARDSPKKAGQQC NARCCSWGKQNTLKCQAQDTISNLK

>ZmHMA3-2

1213  
1214 MPGPAVEAAAARGGGCCGKTAGKWEKTYLDVLGICCTAEVALVERLLAPINGVRVAVTVVPSRTVIVDHD TAAVVSQ  
1215 FHIVKVLNKAGLEASVRAYGSSAGAPGRWPS PFIVACGVLLAASLFAPLLPPLRWLAVAAACVGSQPMLLRFAFAA  
1216 AGKLTLDINILMLIAVAGAVALGSYTEAGAI VFLFTVAEWLET LACTKASAGMSSLMSV PKTVVLAETGQVVMG  
1217 GDVAVGTVVAVRAGDVVPVDGVVVGGQSEVDESSLTGESFPVPKQAQSEVWAGTINLDGYISVRTTALAENSTVA  
1218 KMERLVEEAQNSRSRTQRLIDSCAKHYTPAVV VLAAGVVLV PVLGAPDLEHWFRLSLVLLVSACPCALV LSTPV  
1219 ATFCALLRAARMGLLVKGGNVLES LGEVRVAAFDKTGTITRGEFSIKDFLVVRDKVQMSQLLYWVSSIESKSSHP  
1220 MAAALVEYAQSKSIQPKPEDVTETCIYHGEG IYGAINGKHIYIGNERIMARSSCRQQEAGHRET DGLKGVSVGLV  
1221 ICDGDLVGKFSLSDT CRTGAAEA IQLRSMGIKSVMLTG DSEAAAKHAQEQLGGVLEELHSGLLPEDKVR LIRGL  
1222 QARHGATLMVGDGMNDAPALAAADVGVSMGLSGSAAAIETSHATLMSGDVL RVPKAVRLGRRTRRTIAVNVASSV  
1223 GAKA AVLALAVAWRPV LWWAVLADVGTCLLVVLHSM LLLRDAARARRRRCGGASKACCATA CKAPKTACCATASKA  
1224 CGATTVKPVATRPQAGAGKADRPGGDKHGNGKDDCHRCCHKQSKLPEDAVVIAIPVRAVEHRKDAAAHEKAEG  
1225 NAAGCCGGAPASAACCAEAHGG EDEVCIVISARSPCCSTARSRSASP K DAMCCGSGGKDGGAI SALVC

>ZmHMA3-3

1226  
1227 MPGPAVEAAARS GGDHGGCCGKAAGKWEKTYLDVLGICCTAEVALVERLLTPIQGVRAVTVVPSRTVIVDHD T  
1228 AAVSQFHIVKVLNKAGLEASVRAYGSSAGAGGRWPS PFTVACGALLALSLLAPLLPPLRWLAVAAACVGSQPMLL  
1229 RAFAAAGKLTLDINILMLIAVAGSVALGSFTEAGAI VFLFTVAEWLET LACSKASAGMSSLMS TVPKTVVLAETG  
1230 QVVMGMDVAVGTVVAVRAGDVVPVDGVVVGGHSEVDESSLTGESFPVPKQQAQSEVWAGTINLDGYISVRTTALAE  
1231 NSTVAKMERLVEEAQNSRSRTQRLIDSCAKHYTPAVV VLAAGVVLV PALLGARDLELEHWFRLSLVLLVSACPCA  
1232 LVLSTPVATFCALLRAARMGLLVKGGNVLES LGEVRVAAFDKTGTITRGEFSIKDFHVVDK VEMNQLLYWVSSI  
1233 ESKSSHPMAAALVEYAQSKSVQPKPENVTETCIYHGEG IYGVMDGKQIYIGNERI IARSSCRHHQHAGHQETDGL  
1234 KGV SIGHVICD GDLVGKFSLSDT CRTGAAEA IQLRSMGIKSVMLTG DSAAA AKHAQEQLGGVLEELHAGLLPED  
1235 KVRLVRGLQARHGATLMVGDGMNDAPALAAADVGVSMGLSGSAAAIETSHAALMSGDILRVPKAVRLGRRARRTI  
1236 AVNVASSVGA KAAVLA LAVAWRPV LWWAVLADVGTCLLVVLHSM LLLR DGAARRPRCCASATA CKSKQASKPCCA  
1237 TVKPVATTRHRHGHGHHGAGAGK PTLGGDKQKDC HGCCQKESKPPEDAVVIAIPGRAVEHRKEAFPHENAG  
1238 AGGCCAAAHA EDEVCIVISARSPCCSTARSRS GSPKDALCCHGSGGKDGGAI SALVC

1239
